# Supplementary material for: Spheroid-Induced Epithelial-Mesenchymal Transition Provokes Global Alterations of Breast Cancer Lipidome: A Multi-Layered Omics Analysis
Source: PubMed Central journal article supplement (PMC6437068; doi:10.3389/fonc.2019.00145), 2019-03-21
Supplement: Data_Sheet_1.pdf [file Data_Sheet_1.pdf]

## *Supplementary Material*

### 1 Supplementary Figures and Tables

#### 1.1 Supplementary Figures

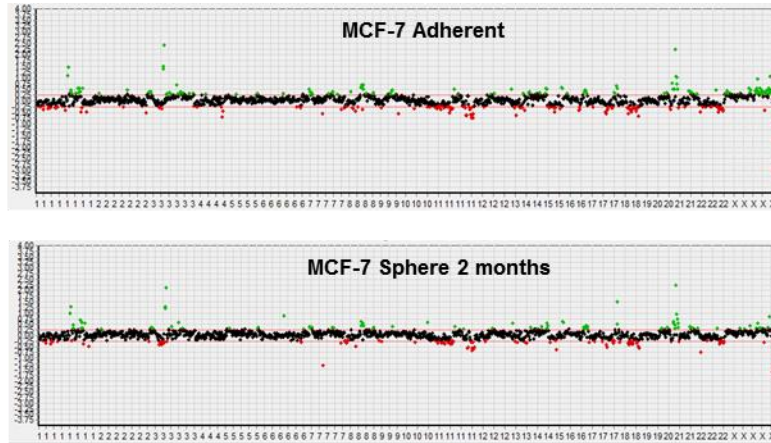

**Supplementary Figure 1.** Comparative genomic hybridization (CGH) analysis between Adherent and Sphere.

## Supplementary Figure 2. Internal spectral library and lipid identification process.

A

Major adduct ions of lipid classes → MS/MS spectrum of authentic STDs → Fragment ions for structure ID

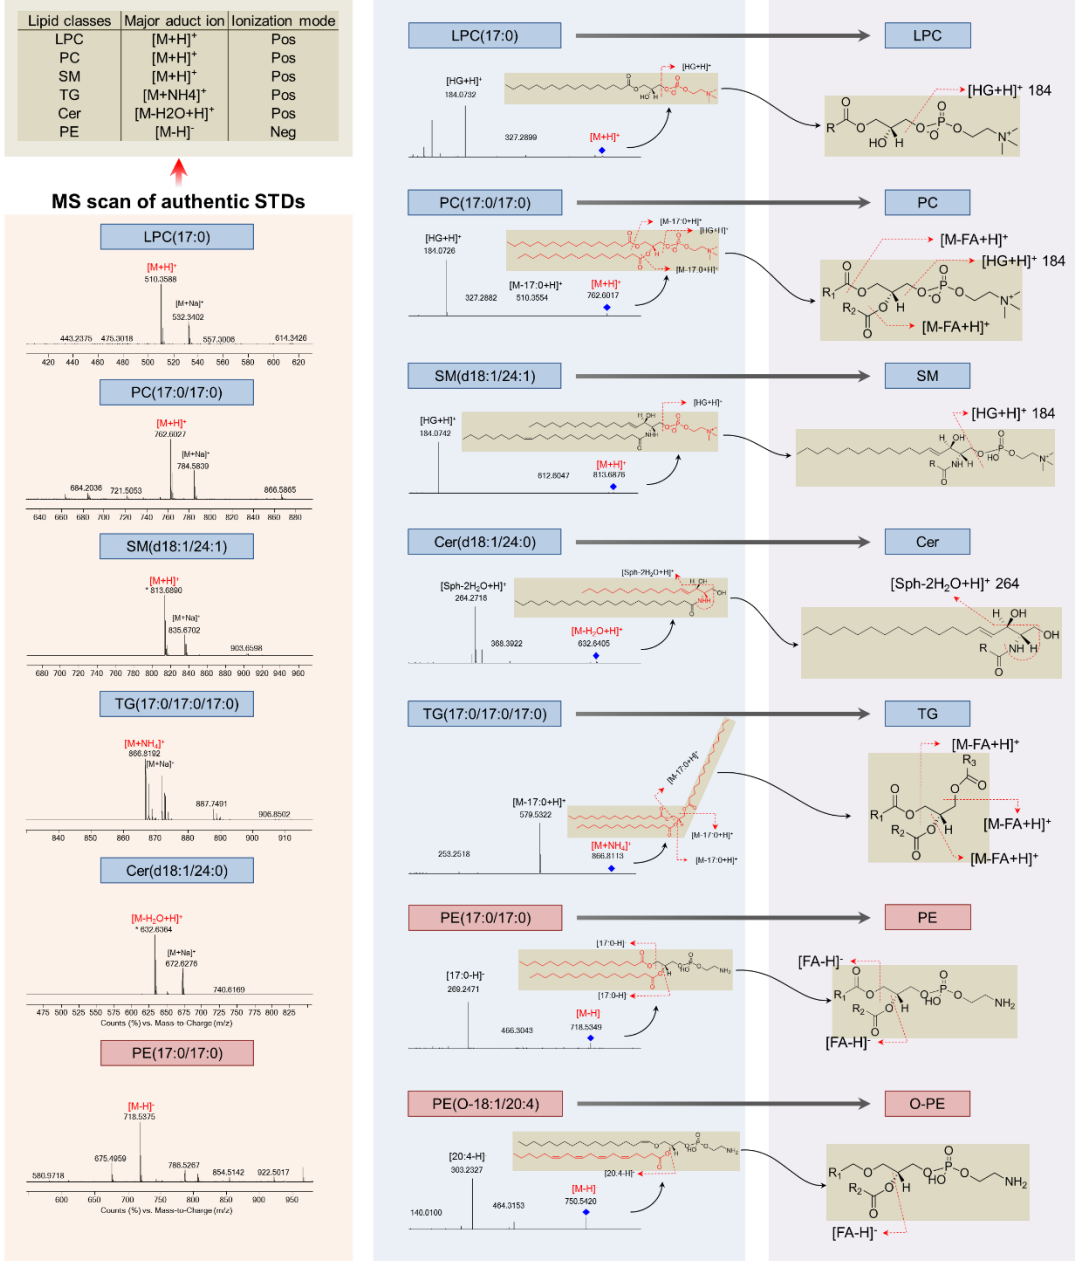

B

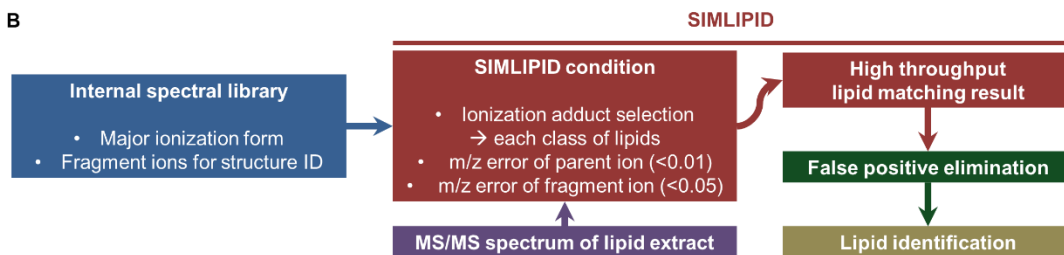

**Supplementary Figure 3. MS and MS/MS spectrum based identification of LPC, PC, O-PC, SM, TG, Cer, PE, and O-PE.**

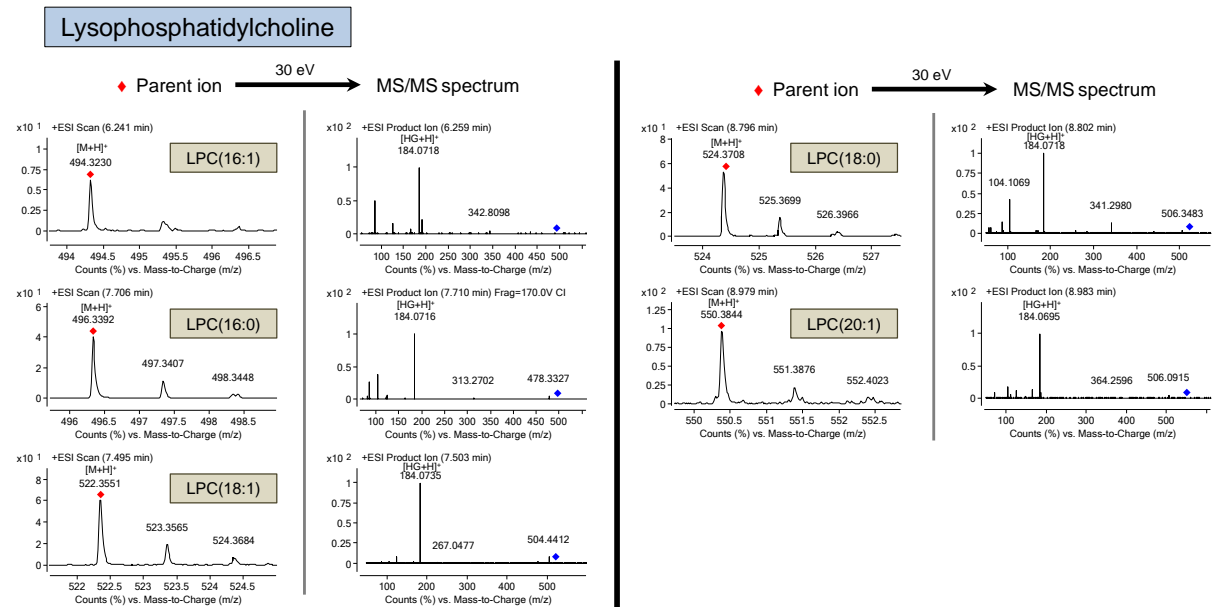

Continued

Phosphatidylcholine

♦ Parent ion  $\xrightarrow{30\text{ eV}}$  MS/MS spectrum

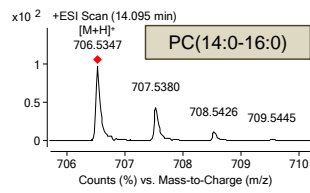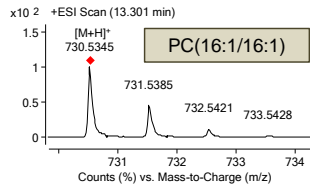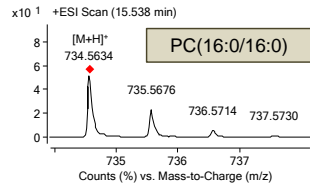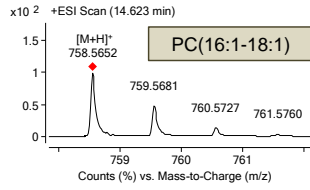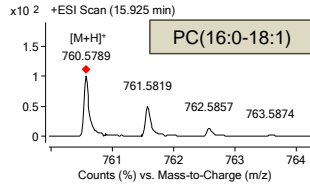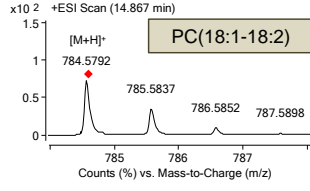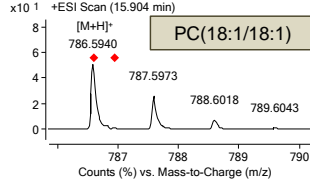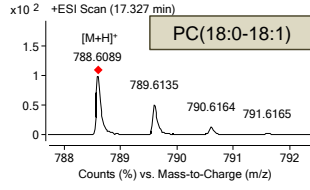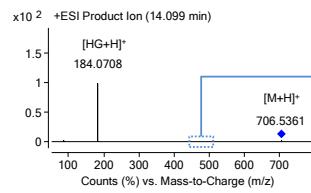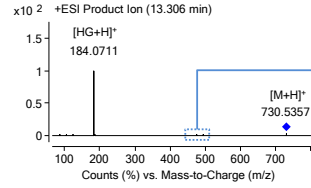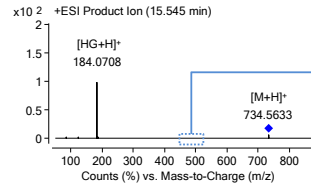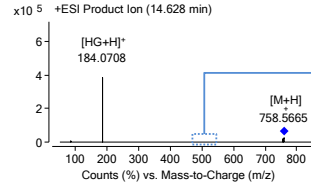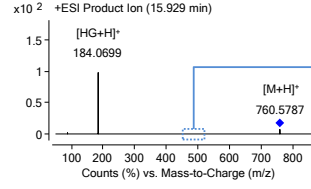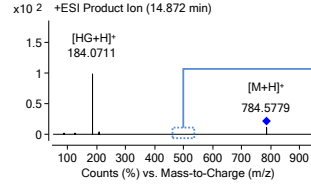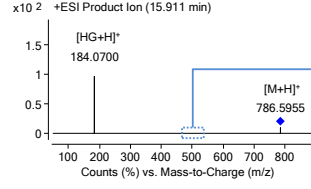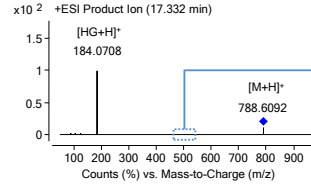

Continued

## Phosphatidylcholine

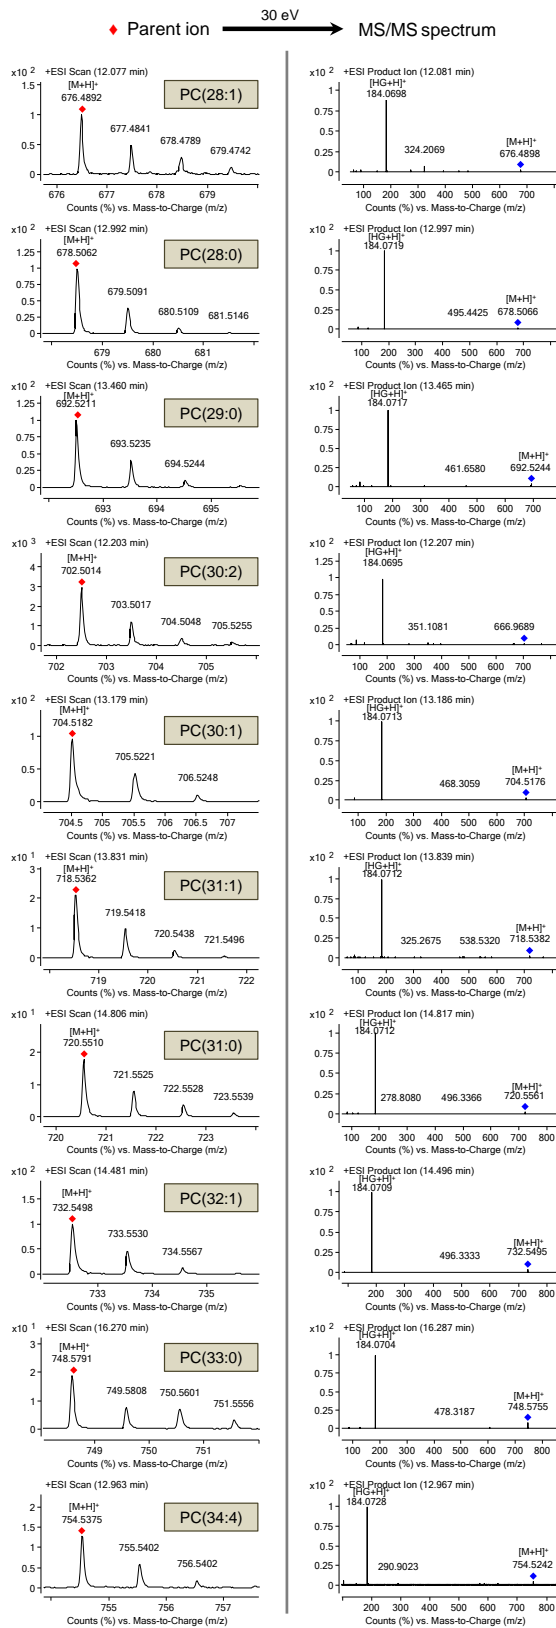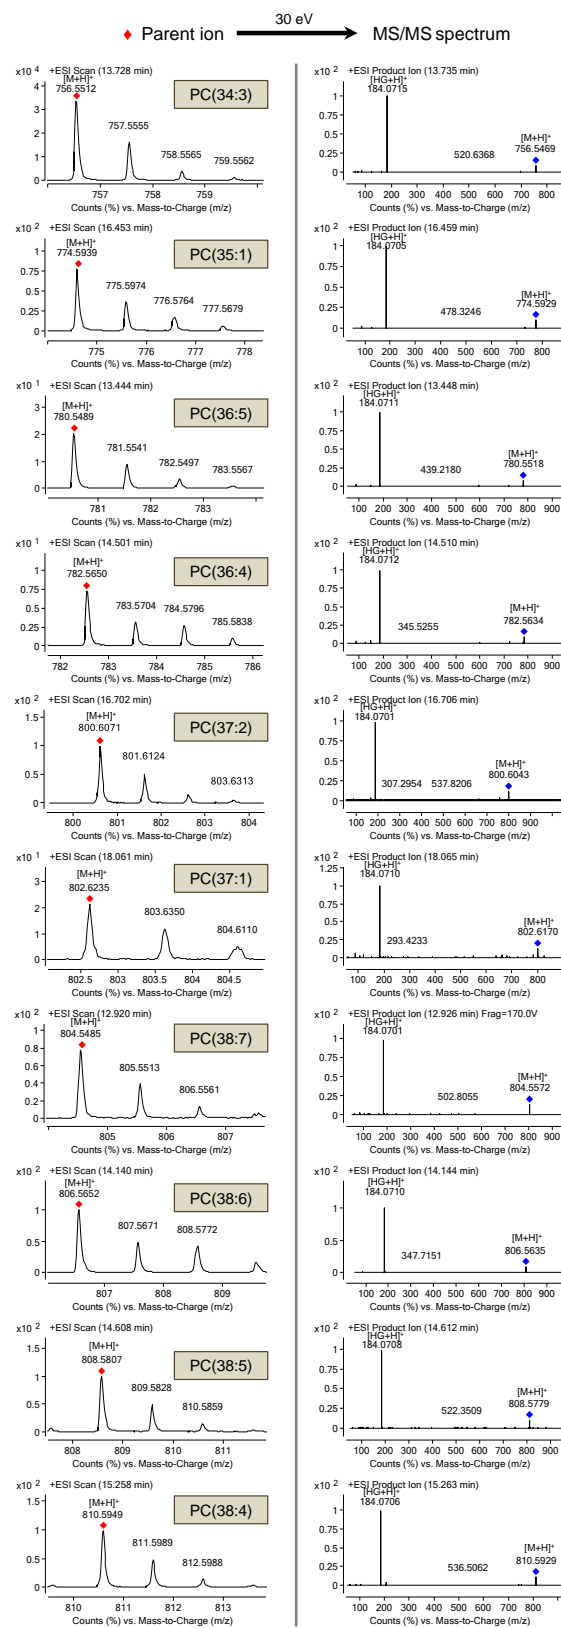

Continued

Phosphatidylcholine

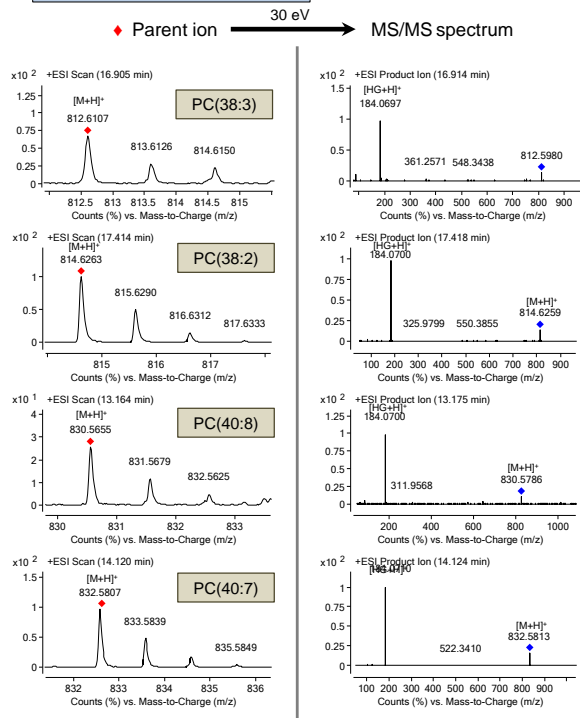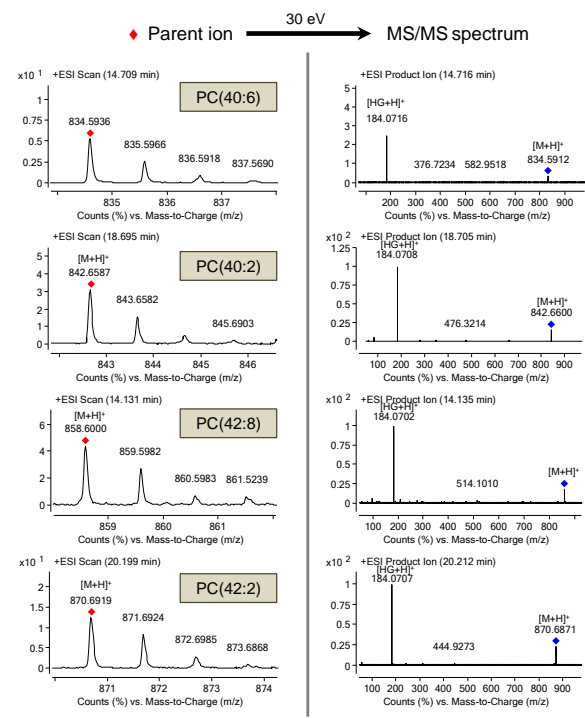

O-Phosphatidylcholine

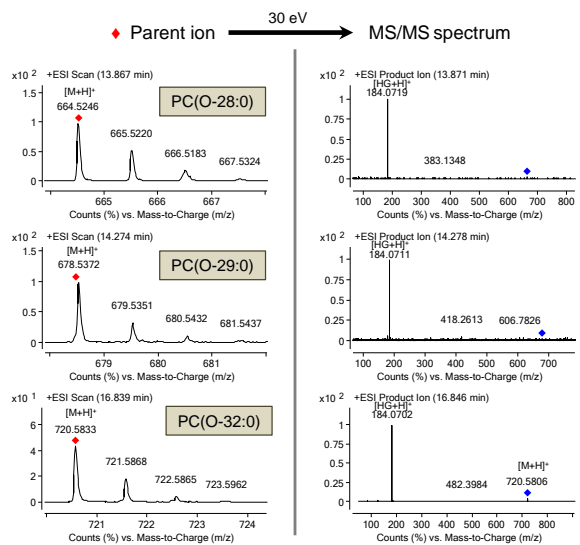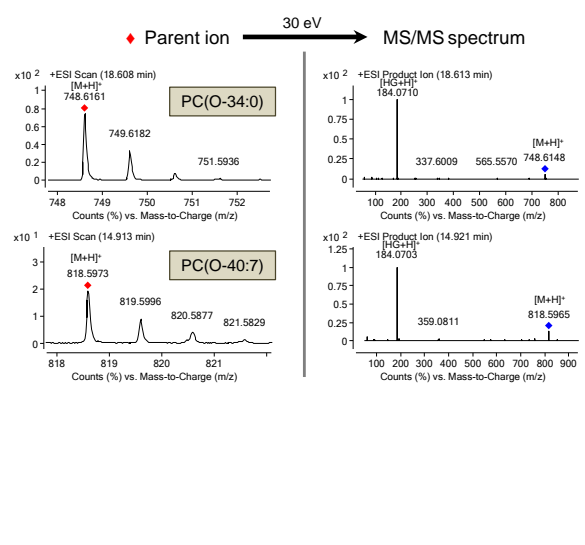

Continued

Sphingomyelin

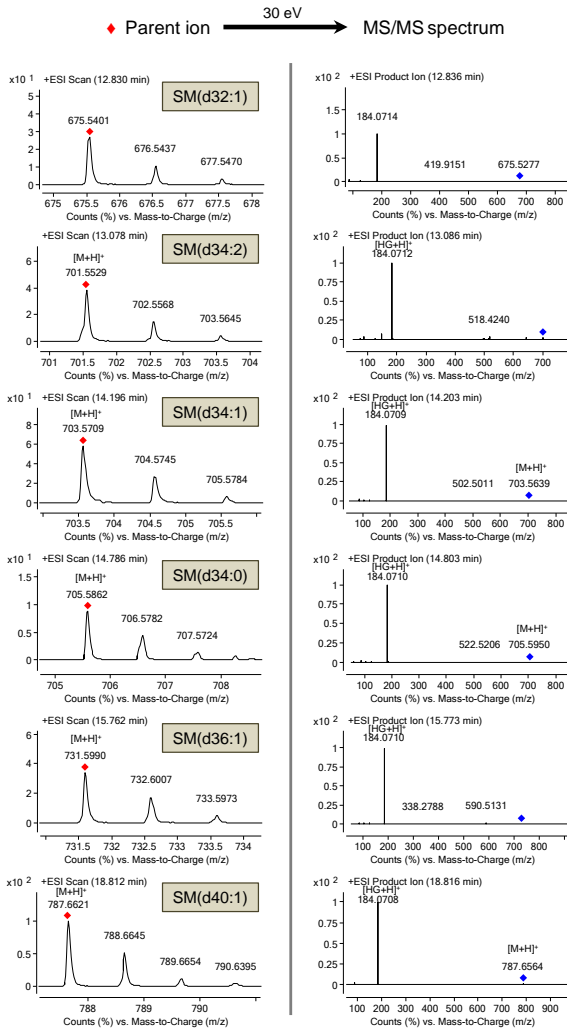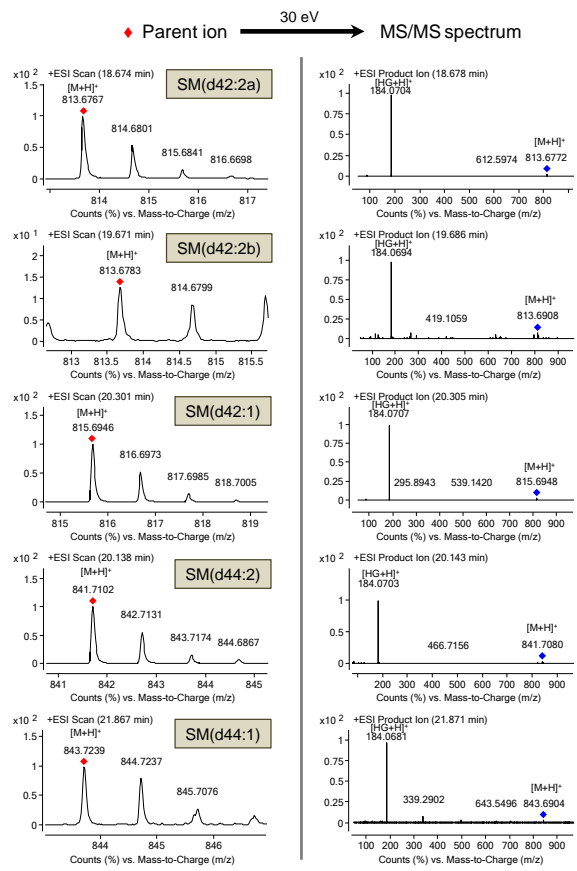

Continued

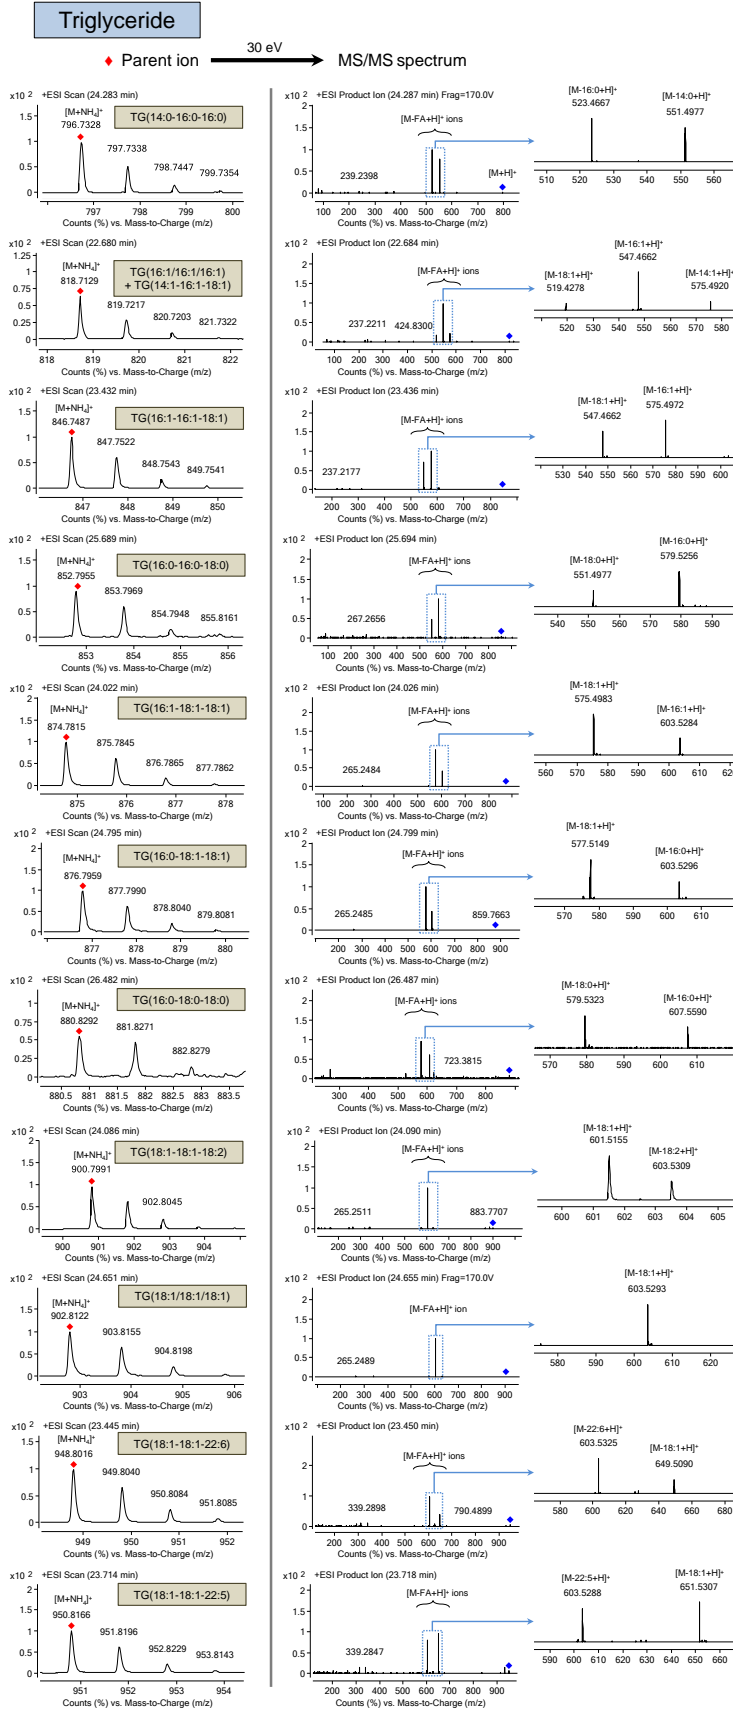

Continued



### Triglyceride

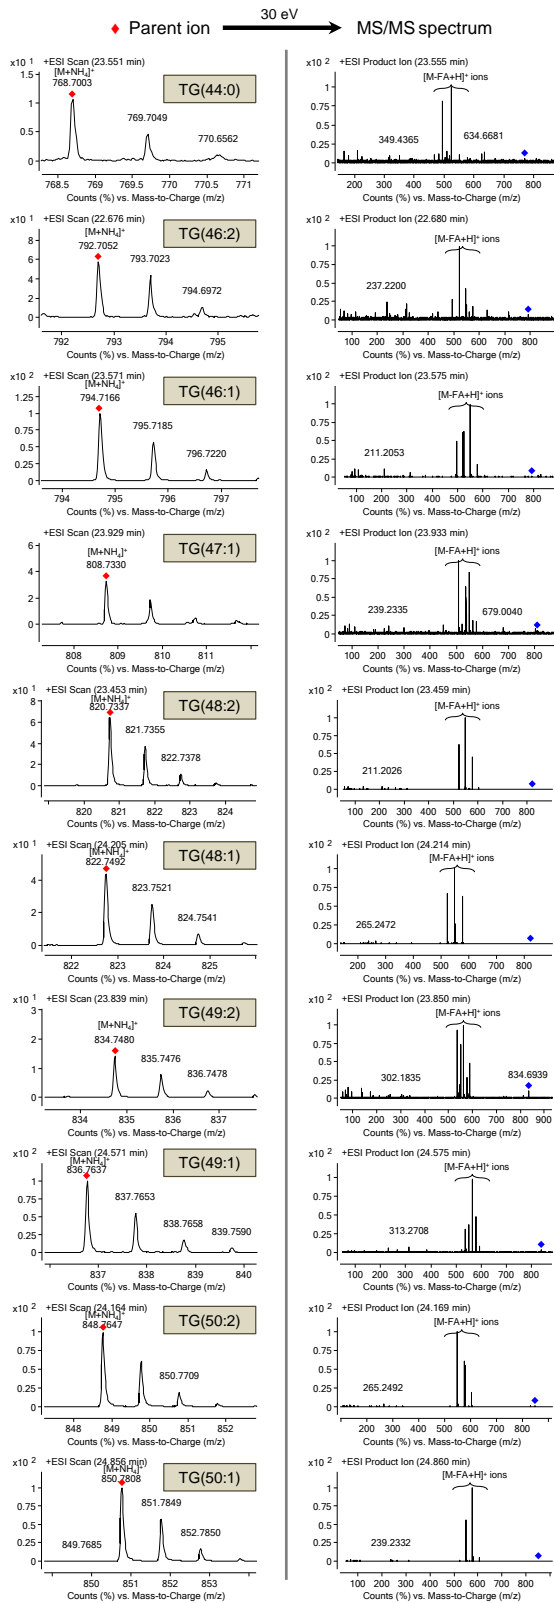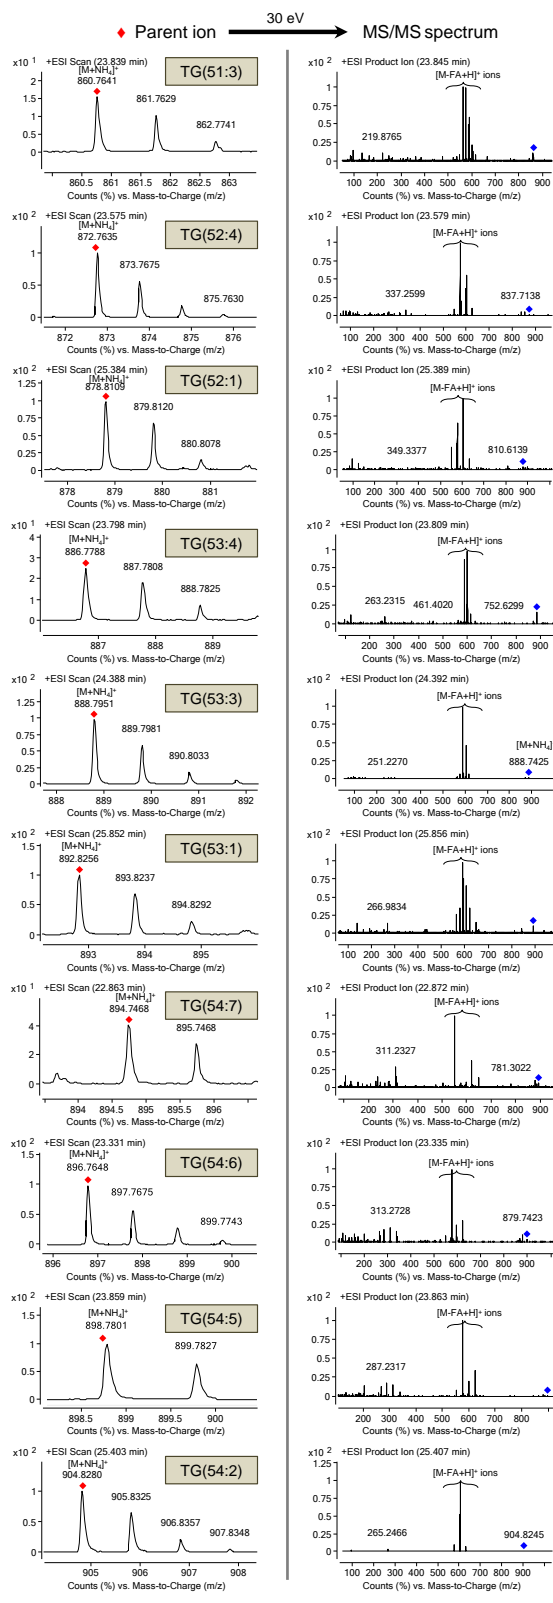

Continued

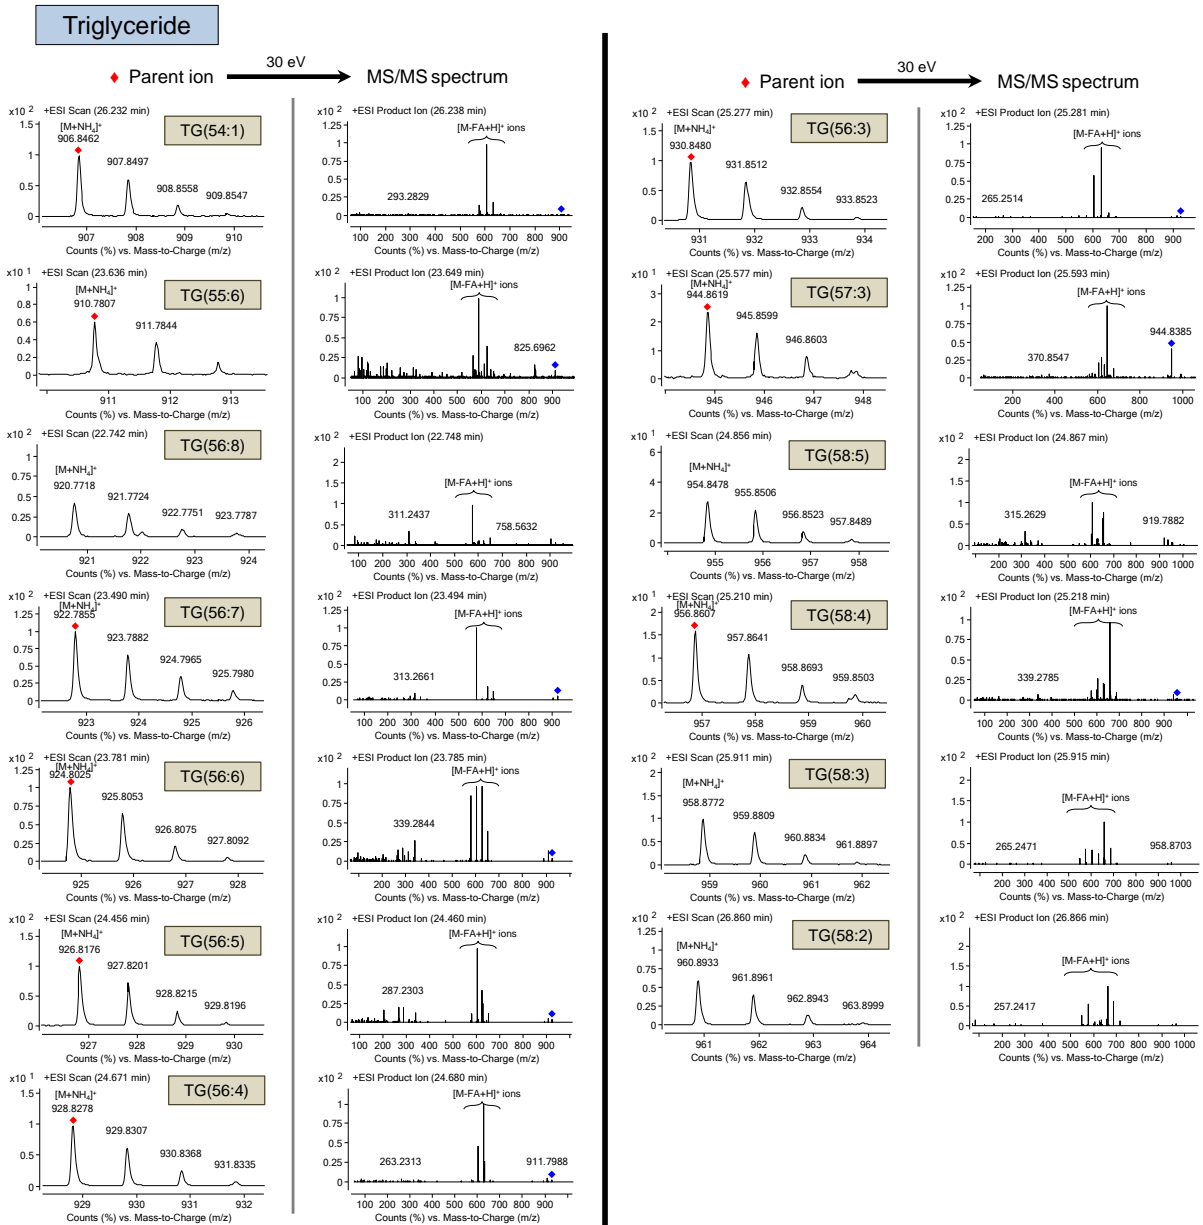

Continued

Ceramide

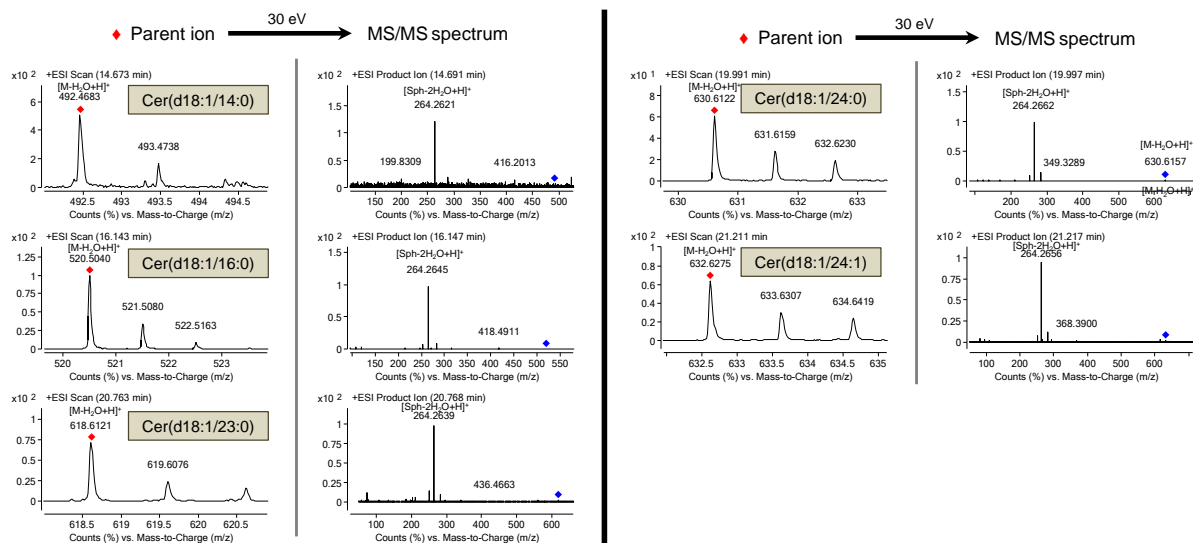

Continued

Phosphatidylethanolamine

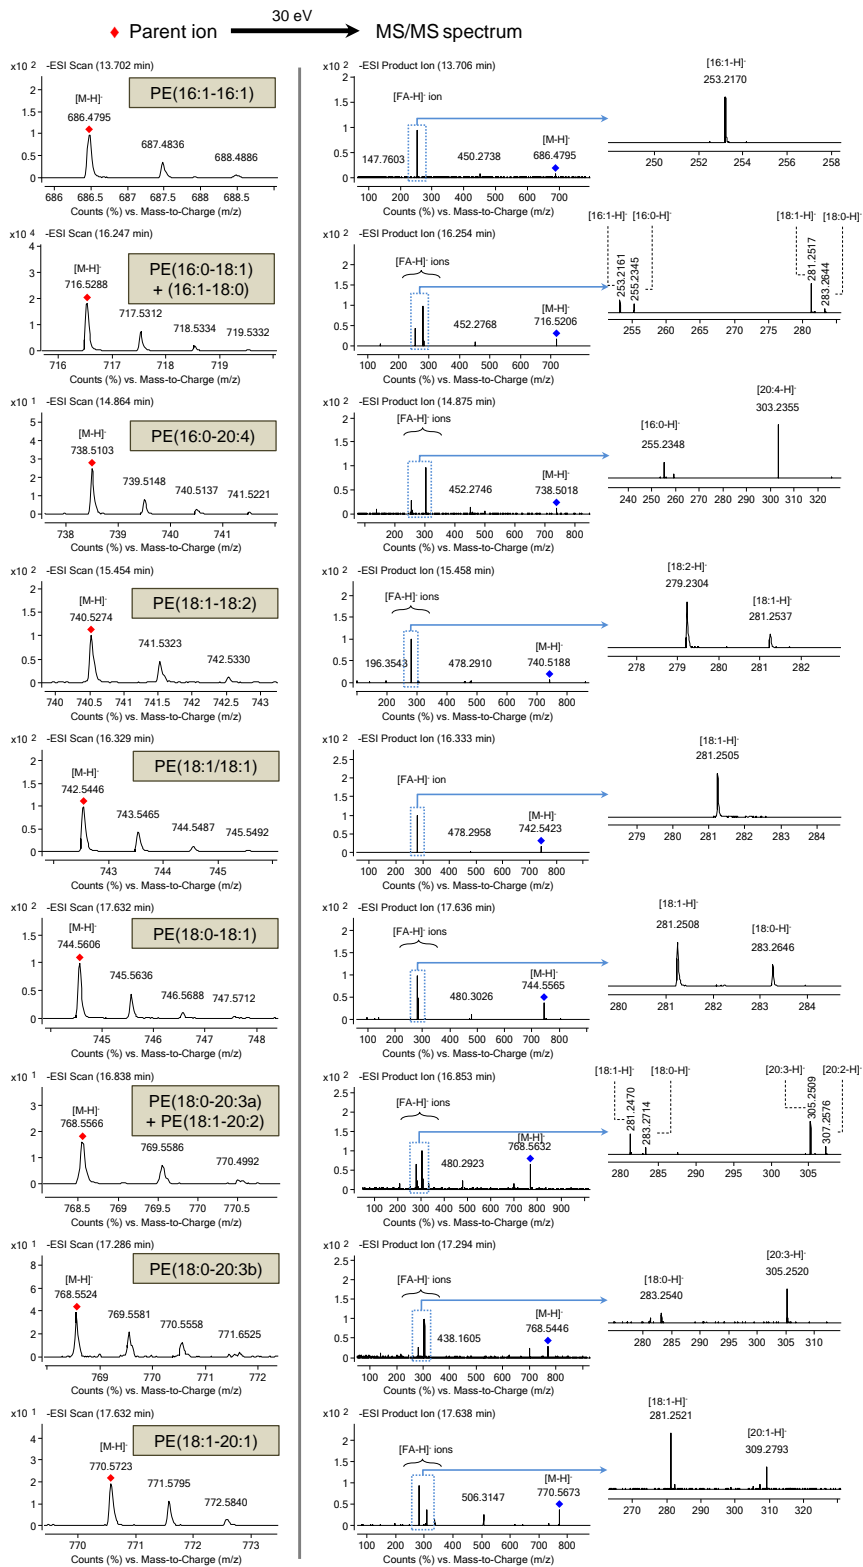

Continued

O-Phosphatidylethanolamine

Parent ion  $\xrightarrow{30\text{ eV}}$  MS/MS spectrum

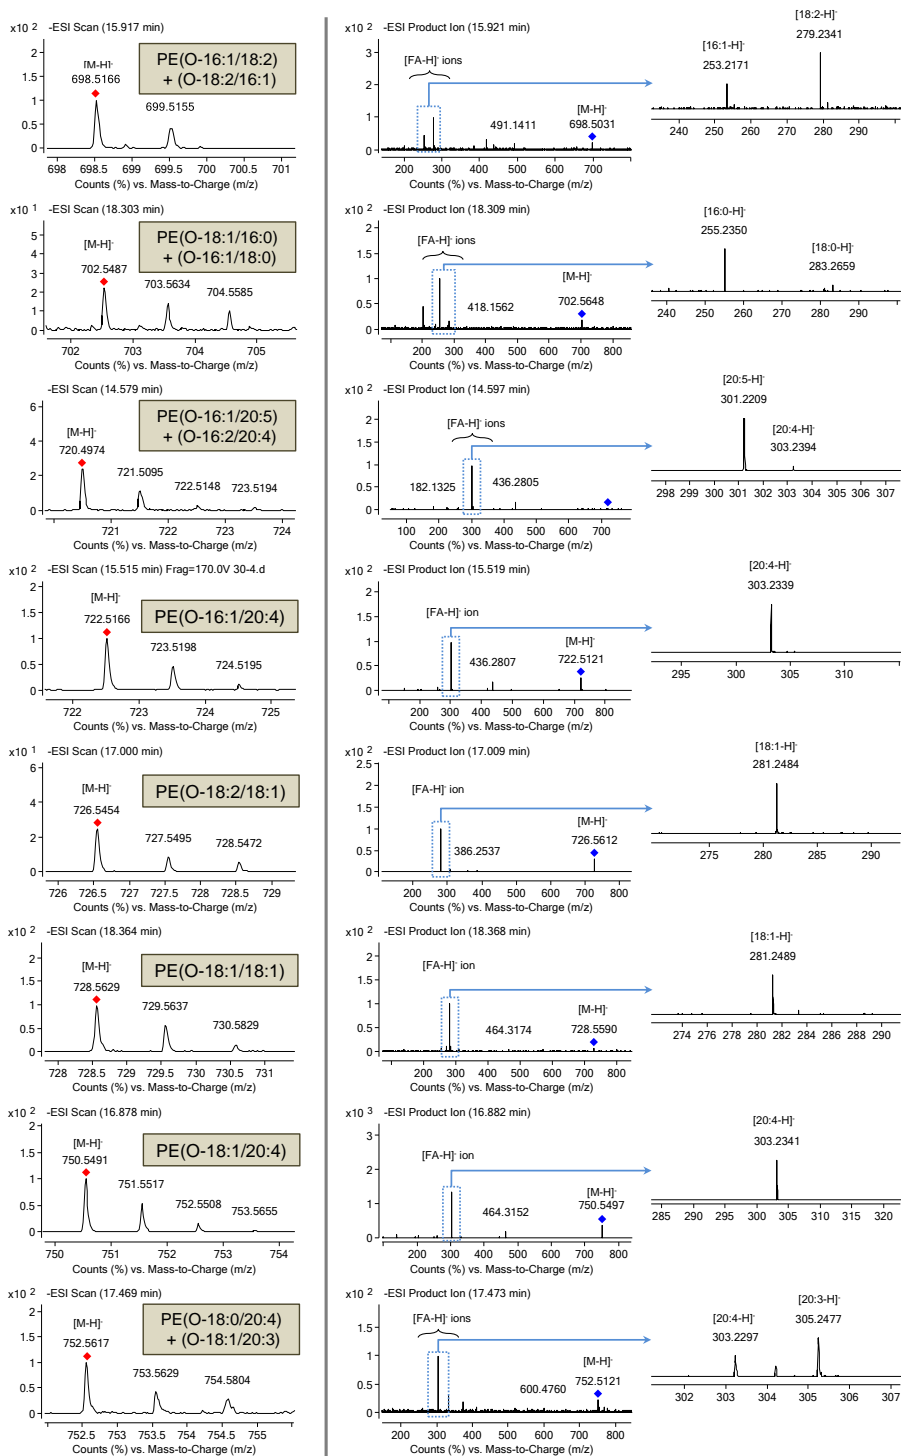

Supplementary Figure 4. PLS-DA scores plot and cross-validation results.

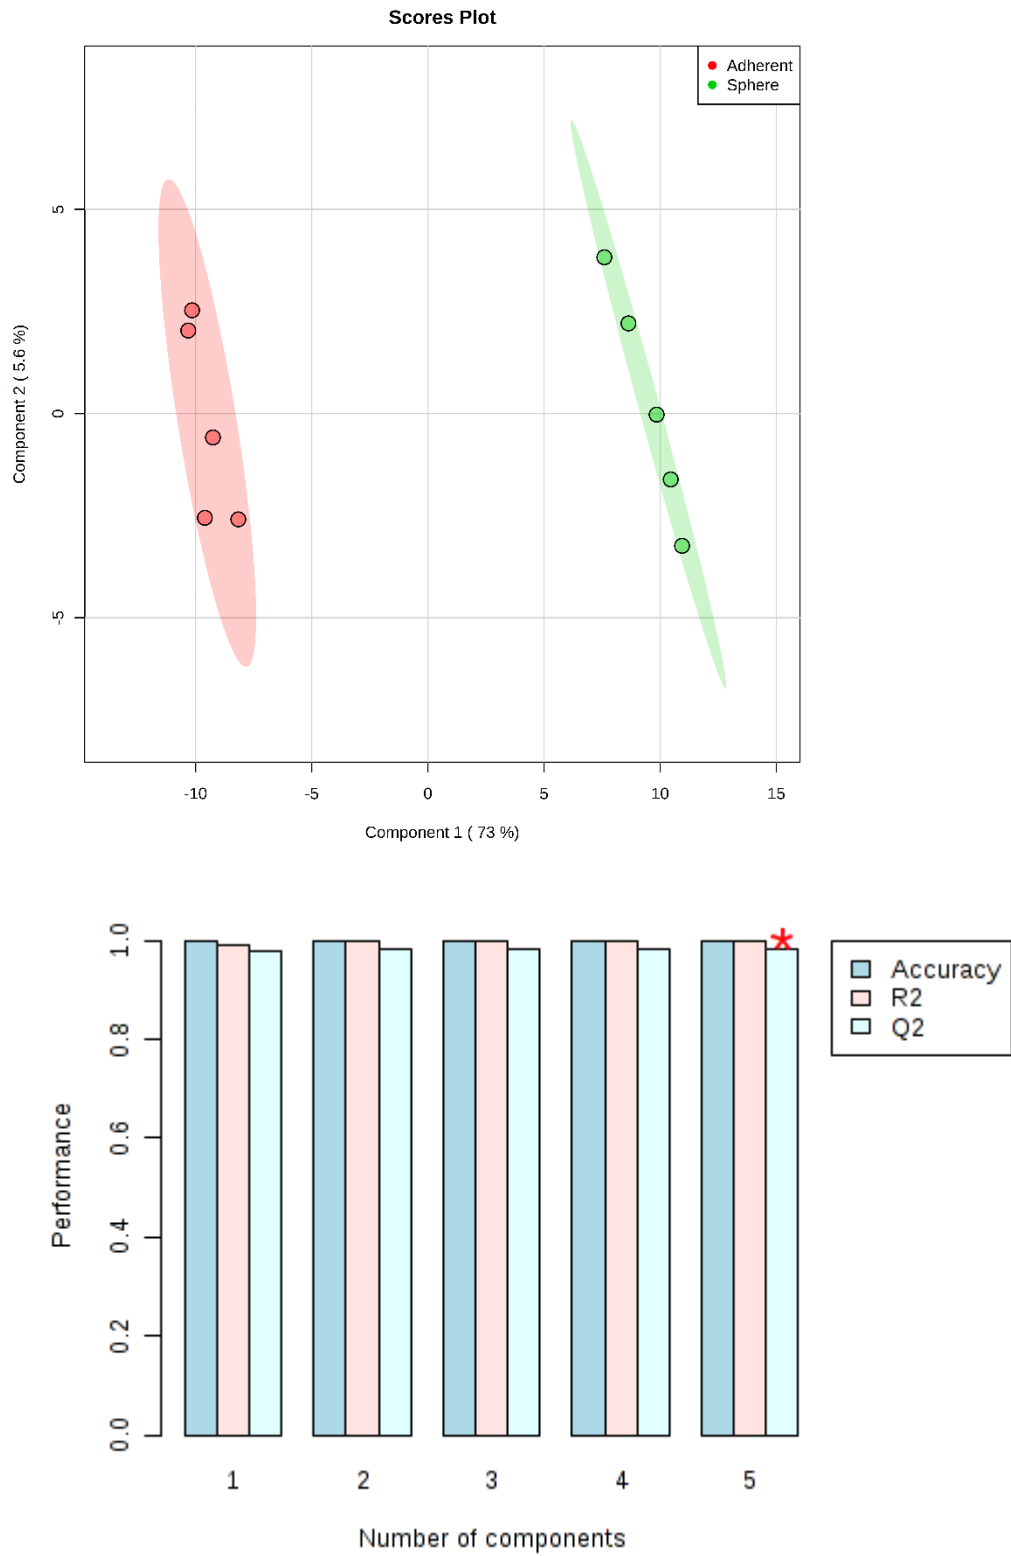

## 1.2 Supplementary Table

**Supplementary Table 1.** Relative response factor (RRF) of 12 FAMES to internal standards.

| <b>FAME</b> | <b>Target m/z</b> | <b>RRF (C17:0)</b> | <b>RRF (C23:0)</b> |
|-------------|-------------------|--------------------|--------------------|
| C16:0       | 74                | 1.0                | 0.9                |
| C16:1       | 55                | 0.3                | 0.3                |
| C18:0       | 74                | 1.1                | 1.0                |
| C18:1       | 55                | 0.4                | 0.4                |
| C18:2       | 67                | 0.4                | 0.4                |
| C20:0       | 74                | 1.1                | 1.0                |
| C20:3n6     | 79                | 0.2                | 0.2                |
| C20:4n6     | 79                | 0.3                | 0.3                |
| C22:0       | 74                | 1.1                | 1.0                |
| C22:5n3     | 79                | 0.5                | 0.4                |
| C22:6n3     | 79                | 0.3                | 0.3                |
| C24:0       | 74                | 1.1                | 1.0                |

**Supplementary Table 2.** Compositions of 123 lipid species and 8 lipid classes between adherent and sphere MCF-7 cells

| RT (min) | Adduct ion                          | row m/z  | theo m/z | delta m/z | Lipids          | Adherent_1 | Adherent_2 | Adherent_3 | Adherent_4 | Adherent_5 | Sphere_1 | Sphere_2 | Sphere_3 | Sphere_4 | Sphere_5 | p.value | FDR   | log2(Fc) |
|----------|-------------------------------------|----------|----------|-----------|-----------------|------------|------------|------------|------------|------------|----------|----------|----------|----------|----------|---------|-------|----------|
| 14.61    | [M-H <sub>2</sub> O+H] <sup>+</sup> | 492.4743 | 492.4775 | 0.0032    | Cer(d18:1/14:0) | 0.00167    | 0.00194    | 0.00169    | 0.00114    | 0.00110    | 0.00339  | 0.00245  | 0.00591  | 0.00374  | 0.00517  | 0.001   | 0.003 | 1.5      |
| 16.19    | [M-H <sub>2</sub> O+H] <sup>+</sup> | 520.5038 | 520.5088 | 0.0050    | Cer(d18:1/16:0) | 0.00945    | 0.01131    | 0.00815    | 0.00129    | 0.00063    | 0.03684  | 0.00409  | 0.06244  | 0.02655  | 0.07032  | 0.032   | 0.060 | 2.7      |
| 20.90    | [M-H <sub>2</sub> O+H] <sup>+</sup> | 618.6132 | 618.6183 | 0.0051    | Cer(d18:1/23:0) | 0.00536    | 0.00581    | 0.00549    | 0.00285    | 0.00345    | 0.00272  | 0.00190  | 0.00425  | 0.00278  | 0.00400  | 0.097   | 0.159 | -        |
| 21.45    | [M-H <sub>2</sub> O+H] <sup>+</sup> | 632.6293 | 632.6340 | 0.0047    | Cer(d18:1/24:0) | 0.05902    | 0.06273    | 0.05691    | 0.02865    | 0.03540    | 0.03919  | 0.02783  | 0.06531  | 0.04240  | 0.05759  | 0.855   | 0.899 | -        |
| 20.19    | [M-H <sub>2</sub> O+H] <sup>+</sup> | 630.6133 | 630.6183 | 0.0050    | Cer(d18:1/24:1) | 0.16066    | 0.01247    | 0.16399    | 0.08106    | 0.09863    | 0.32302  | 0.22559  | 0.52945  | 0.34432  | 0.44763  | 0.014   | 0.032 | 1.9      |
| 7.45     | [M+H] <sup>+</sup>                  | 496.3407 | 496.3403 | 0.0004    | LPC(16:0)       | 0.19220    | 0.20277    | 0.18155    | 0.10363    | 0.11453    | 0.10569  | 0.06916  | 0.67675  | 0.11160  | 0.14735  | 0.988   | 0.988 | -        |
| 5.92     | [M+H] <sup>+</sup>                  | 494.3248 | 494.3241 | 0.0007    | LPC(16:1)       | 0.02108    | 0.03124    | 0.02951    | 0.01686    | 0.01423    | 0.01730  | 0.01970  | 0.17548  | 0.02226  | 0.02827  | 0.385   | 0.493 | -        |
| 8.92     | [M+H] <sup>+</sup>                  | 524.3723 | 524.3716 | 0.0007    | LPC(18:0)       | 0.02687    | 0.02697    | 0.02832    | 0.01342    | 0.01633    | 0.01723  | 0.00787  | 0.07054  | 0.01157  | 0.01482  | 0.631   | 0.711 | -        |
| 7.76     | [M+H] <sup>+</sup>                  | 522.3558 | 522.3559 | 0.0001    | LPC(18:1)       | 0.10235    | 0.07614    | 0.12546    | 0.03804    | 0.04231    | 0.03356  | 0.05344  | 0.53650  | 0.08115  | 0.01906  | 0.986   | 0.988 | -        |
| 9.07     | [M+H] <sup>+</sup>                  | 550.3875 | 550.3867 | 0.0008    | LPC(20:1)       | 0.00557    | 0.00623    | 0.00688    | 0.00336    | 0.00367    | 0.00496  | 0.00372  | 0.03598  | 0.00556  | 0.00762  | 0.319   | 0.432 | -        |
| 14.19    | [M+H] <sup>+</sup>                  | 706.5350 | 706.5387 | 0.0037    | PC(14:0-16:0)   | 2.16198    | 2.17916    | 2.48730    | 1.28463    | 1.31154    | 1.15146  | 2.01159  | 1.87080  | 1.17333  | 1.74368  | 0.408   | 0.506 | -        |
| 15.76    | [M+H] <sup>+</sup>                  | 734.5629 | 734.5700 | 0.0071    | PC(16:0/16:0)   | 0.80140    | 0.05493    | 0.25559    | 0.13336    | 0.47603    | 0.03637  | 0.84165  | 0.03596  | 0.48875  | 0.05140  | 0.456   | 0.551 | -        |
| 15.75    | [M+H] <sup>+</sup>                  | 760.5779 | 760.5856 | 0.0077    | PC(16:0-18:1)   | 5.46140    | 5.46184    | 5.78045    | 3.24104    | 3.28987    | 3.34168  | 5.61236  | 5.28933  | 3.29846  | 4.86705  | 0.873   | 0.910 | -        |
| 13.39    | [M+H] <sup>+</sup>                  | 730.5374 | 730.5387 | 0.0013    | PC(16:1/16:1)   | 2.52199    | 2.53006    | 2.91783    | 1.40021    | 1.48999    | 3.07804  | 5.30833  | 5.15300  | 3.14254  | 4.70143  | 0.007   | 0.017 | 1.0      |
| 14.69    | [M+H] <sup>+</sup>                  | 758.5637 | 758.5700 | 0.0063    | PC(16:1-18:1)   | 3.43603    | 3.44394    | 3.88446    | 2.07404    | 2.08145    | 3.52753  | 5.87264  | 5.59140  | 3.50381  | 5.23421  | 0.028   | 0.054 | 0.7      |
| 17.45    | [M+H] <sup>+</sup>                  | 788.6092 | 788.6169 | 0.0077    | PC(18:0-18:1)   | 1.13062    | 1.14763    | 1.23598    | 0.61104    | 0.66149    | 0.71917  | 1.09575  | 1.01060  | 0.62620  | 0.83054  | 0.638   | 0.713 | -        |
| 15.94    | [M+H] <sup>+</sup>                  | 786.5926 | 786.6013 | 0.0087    | PC(18:1/18:1)   | 2.80195    | 2.79919    | 3.12470    | 1.68080    | 1.68865    | 2.42438  | 4.08792  | 3.90297  | 2.41918  | 3.61418  | 0.113   | 0.184 | -        |

Continued

| RT (min) | Adduct ion | row m/z | theo m/z | delta m/z | Lipids | Adherent_1 | Adherent_2 | Adherent_3 | Adherent_4 | Adherent_5 | Sphere_1 | Sphere_2 | Sphere_3 | Sphere_4 | Sphere_5 | p.value | FDR | log2(Fc) |
|----------|------------|---------|----------|-----------|--------|------------|------------|------------|------------|------------|----------|----------|----------|----------|----------|---------|-----|----------|
|----------|------------|---------|----------|-----------|--------|------------|------------|------------|------------|------------|----------|----------|----------|----------|----------|---------|-----|----------|



|       |                    |          |          |        |               |         |         |         |         |         |         |         |         |         |         |       |       |      |
|-------|--------------------|----------|----------|--------|---------------|---------|---------|---------|---------|---------|---------|---------|---------|---------|---------|-------|-------|------|
| 14.90 | [M+H] <sup>+</sup> | 784.5795 | 784.5856 | 0.0061 | PC(18:1-18:2) | 0.36488 | 0.37788 | 0.29732 | 0.10491 | 0.22143 | 0.40334 | 0.66750 | 0.64102 | 0.39790 | 0.58482 | 0.021 | 0.043 | 1.0  |
| 13.01 | [M+H] <sup>+</sup> | 678.5082 | 678.5074 | 0.0008 | PC(28:0)      | 1.12303 | 1.11086 | 1.28900 | 0.60543 | 0.66454 | 0.37878 | 0.66530 | 0.63385 | 0.38835 | 0.56964 | 0.018 | 0.037 | -0.9 |
| 12.07 | [M+H] <sup>+</sup> | 676.4923 | 676.4917 | 0.0006 | PC(28:1)      | 0.02278 | 0.02261 | 0.02416 | 0.01239 | 0.01331 | 0.01607 | 0.02862 | 0.02680 | 0.01743 | 0.02520 | 0.331 | 0.438 | -    |
| 13.50 | [M+H] <sup>+</sup> | 692.5227 | 692.5230 | 0.0003 | PC(29:0)      | 0.28121 | 0.28591 | 0.24798 | 0.15025 | 0.16512 | 0.04464 | 0.07605 | 0.07439 | 0.04324 | 0.06538 | 0.000 | 0.000 | -1.9 |
| 13.09 | [M+H] <sup>+</sup> | 704.5225 | 704.5230 | 0.0005 | PC(30:1)      | 3.07582 | 3.10765 | 3.59314 | 1.71382 | 1.83216 | 2.03719 | 1.70626 | 1.65806 | 0.95864 | 3.14094 | 0.172 | 0.262 | -    |
| 12.33 | [M+H] <sup>+</sup> | 702.5068 | 702.5074 | 0.0006 | PC(30:2)      | 0.01296 | 0.00826 | 0.01394 | 0.00461 | 0.00503 | 0.01377 | 0.02317 | 0.02314 | 0.01362 | 0.00761 | 0.080 | 0.134 | -    |
| 14.50 | [M+H] <sup>+</sup> | 720.5482 | 720.5543 | 0.0061 | PC(31:0)      | 0.07173 | 0.07094 | 0.08246 | 0.03931 | 0.04040 | 0.01333 | 0.02364 | 0.02146 | 0.01355 | 0.02070 | 0.000 | 0.001 | -1.7 |
| 13.86 | [M+H] <sup>+</sup> | 718.5381 | 718.5387 | 0.0006 | PC(31:1)      | 0.74423 | 0.74775 | 0.85697 | 0.40000 | 0.44169 | 0.18474 | 0.31441 | 0.31012 | 0.18032 | 0.27129 | 0.002 | 0.005 | -1.3 |
| 14.42 | [M+H] <sup>+</sup> | 732.5495 | 732.5543 | 0.0048 | PC(32:1)      | 6.63621 | 6.58136 | 4.37350 | 3.96673 | 3.97177 | 3.97459 | 6.89162 | 6.47826 | 4.08633 | 6.10506 | 0.657 | 0.721 | -    |
| 16.28 | [M+H] <sup>+</sup> | 748.5767 | 748.5856 | 0.0089 | PC(33:0)      | 0.12553 | 0.13291 | 0.14833 | 0.07419 | 0.07696 | 0.02570 | 0.04401 | 0.04164 | 0.02542 | 0.03844 | 0.000 | 0.001 | -1.7 |
| 13.71 | [M+H] <sup>+</sup> | 756.5512 | 756.5543 | 0.0031 | PC(34:3)      | 0.31215 | 0.31235 | 0.35567 | 0.17228 | 0.18433 | 0.41337 | 0.22502 | 0.68097 | 0.41422 | 0.61000 | 0.061 | 0.107 | -    |
| 13.12 | [M+H] <sup>+</sup> | 754.5351 | 754.5387 | 0.0036 | PC(34:4)      | 0.17122 | 0.16812 | 0.17926 | 0.00580 | 0.10284 | 0.06301 | 0.10947 | 0.10386 | 0.06656 | 0.09600 | 0.909 | 0.939 | -    |
| 16.54 | [M+H] <sup>+</sup> | 774.5921 | 774.6013 | 0.0092 | PC(35:1)      | 0.44207 | 0.01561 | 0.42758 | 0.24771 | 0.26100 | 0.11790 | 0.19884 | 0.00216 | 0.11540 | 0.16807 | 0.346 | 0.448 | -    |
| 14.38 | [M+H] <sup>+</sup> | 782.5633 | 782.5700 | 0.0067 | PC(36:4)      | 0.15409 | 0.18483 | 0.30790 | 0.10926 | 0.17849 | 0.05300 | 0.07499 | 0.07395 | 0.04720 | 0.06816 | 0.001 | 0.002 | -1.6 |
| 13.48 | [M+H] <sup>+</sup> | 780.5510 | 780.5543 | 0.0033 | PC(36:5)      | 0.22301 | 0.22138 | 0.23340 | 0.11779 | 0.13212 | 0.01235 | 0.02903 | 0.01329 | 0.00752 | 0.02524 | 0.000 | 0.000 | -3.4 |
| 17.90 | [M+H] <sup>+</sup> | 802.6247 | 802.6326 | 0.0079 | PC(37:1)      | 0.03246 | 0.00287 | 0.02888 | 0.01747 | 0.01939 | 0.01257 | 0.02087 | 0.02014 | 0.01187 | 0.01704 | 0.946 | 0.962 | -    |
| 16.86 | [M+H] <sup>+</sup> | 800.6184 | 800.6169 | 0.0015 | PC(37:2)      | 0.00884 | 0.00816 | 0.00839 | 0.00442 | 0.00478 | 0.00220 | 0.00338 | 0.00339 | 0.00198 | 0.00282 | 0.001 | 0.004 | -1.3 |
| 17.44 | [M+H] <sup>+</sup> | 814.6244 | 814.6326 | 0.0082 | PC(38:2)      | 0.48481 | 0.49892 | 0.55030 | 0.26667 | 0.28083 | 0.42130 | 0.72585 | 0.68260 | 0.41120 | 0.58720 | 0.135 | 0.213 | -    |
| 17.26 | [M+H] <sup>+</sup> | 812.6188 | 812.6169 | 0.0019 | PC(38:3)      | 0.00056 | 0.00008 | 0.00029 | 0.00112 | 0.00165 | 0.00024 | 0.00033 | 0.00055 | 0.00035 | 0.00038 | 0.643 | 0.713 | -    |
| 15.26 | [M+H] <sup>+</sup> | 810.5932 | 810.6013 | 0.0081 | PC(38:4)      | 0.07182 | 0.07407 | 0.08435 | 0.03965 | 0.04294 | 0.01549 | 0.02945 | 0.02134 | 0.01051 | 0.02490 | 0.001 | 0.004 | -1.6 |

Continued

| RT (min) | Adduct ion | row m/z | theo m/z | delta m/z | Lipids | Adherent_1 | Adherent_2 | Adherent_3 | Adherent_4 | Adherent_5 | Sphere_1 | Sphere_2 | Sphere_3 | Sphere_4 | Sphere_5 | p.value | FDR | log2(Fc) |
|----------|------------|---------|----------|-----------|--------|------------|------------|------------|------------|------------|----------|----------|----------|----------|----------|---------|-----|----------|
|----------|------------|---------|----------|-----------|--------|------------|------------|------------|------------|------------|----------|----------|----------|----------|----------|---------|-----|----------|

|       |                    |          |          |        |                                   |          |          |          |          |          |          |          |          |          |          |       |       |      |
|-------|--------------------|----------|----------|--------|-----------------------------------|----------|----------|----------|----------|----------|----------|----------|----------|----------|----------|-------|-------|------|
| 14.51 | [M+H] <sup>+</sup> | 808.5786 | 808.5856 | 0.0070 | PC(38:5)                          | 0.27334  | 0.27605  | 0.14845  | 0.16256  | 0.17030  | 0.03184  | 0.03491  | 0.03318  | 0.02162  | 0.00482  | 0.000 | 0.002 | -3.0 |
| 14.27 | [M+H] <sup>+</sup> | 806.5653 | 806.5700 | 0.0047 | PC(38:6)                          | 0.27442  | 0.28386  | 0.07520  | 0.16141  | 0.17299  | 0.04481  | 0.02427  | 0.02064  | 0.01416  | 0.01943  | 0.000 | 0.001 | -3.0 |
| 12.93 | [M+H] <sup>+</sup> | 804.5537 | 804.5543 | 0.0006 | PC(38:7)                          | 0.05255  | 0.05141  | 0.05240  | 0.02748  | 0.03112  | 0.00075  | 0.00088  | 0.00084  | 0.00069  | 0.00089  | 0.000 | 0.000 | -5.7 |
| 18.73 | [M+H] <sup>+</sup> | 842.6583 | 842.6639 | 0.0056 | PC(40:2)                          | 0.05588  | 0.05433  | 0.06286  | 0.02902  | 0.03206  | 0.03076  | 0.05786  | 0.04698  | 0.01701  | 0.04850  | 0.505 | 0.592 | -    |
| 15.00 | [M+H] <sup>+</sup> | 834.5932 | 834.6007 | 0.0075 | PC(40:6)                          | 0.00817  | 0.06760  | 0.02489  | 0.03876  | 0.04180  | 0.00796  | 0.00603  | 0.00568  | 0.00358  | 0.00494  | 0.002 | 0.006 | -2.7 |
| 14.16 | [M+H] <sup>+</sup> | 832.5781 | 832.5856 | 0.0075 | PC(40:7)                          | 0.19792  | 0.20078  | 0.21840  | 0.11735  | 0.12565  | 0.00442  | 0.00615  | 0.00600  | 0.00404  | 0.00546  | 0.000 | 0.000 | -5.0 |
| 13.26 | [M+H] <sup>+</sup> | 830.5673 | 830.5700 | 0.0027 | PC(40:8)                          | 0.00833  | 0.00816  | 0.00853  | 0.00432  | 0.00504  | 0.00028  | 0.00025  | 0.00023  | 0.00016  | 0.00024  | 0.000 | 0.000 | -4.9 |
| 20.15 | [M+H] <sup>+</sup> | 870.6890 | 870.6952 | 0.0062 | PC(42:2)                          | 0.04958  | 0.02368  | 0.05744  | 0.00557  | 0.01223  | 0.02040  | 0.03646  | 0.03566  | 0.02060  | 0.03100  | 0.583 | 0.670 | -    |
| 14.10 | [M+H] <sup>+</sup> | 858.5955 | 858.6013 | 0.0058 | PC(42:8)                          | 0.00153  | 0.00166  | 0.00186  | 0.00098  | 0.00105  | 0.00004  | 0.00006  | 0.00004  | 0.00004  | 0.00004  | 0.000 | 0.000 | -5.1 |
| 13.87 | [M+H] <sup>+</sup> | 664.5246 | 664.5281 | 0.0035 | PC(O-28:0)                        | 0.00294  | 0.00269  | 0.00296  | 0.00155  | 0.00165  | 0.00023  | 0.00018  | 0.00029  | 0.00018  | 0.00020  | 0.000 | 0.000 | -3.4 |
| 14.32 | [M+H] <sup>+</sup> | 678.5391 | 678.5437 | 0.0046 | PC(O-29:0)                        | 0.00011  | 0.00005  | 0.00006  | 0.00008  | 0.00005  | 0.00001  | 0.00001  | 0.00001  | 0.00000  | 0.00001  | 0.000 | 0.000 | -3.4 |
| 16.80 | [M+H] <sup>+</sup> | 720.5817 | 720.5907 | 0.0090 | PC(O-32:0)                        | 0.00368  | 0.00405  | 0.00417  | 0.00198  | 0.00187  | 0.00001  | 0.00001  | 0.00000  | 0.00000  | 0.00000  | 0.000 | 0.000 | -9.2 |
| 18.96 | [M+H] <sup>+</sup> | 748.6139 | 748.6220 | 0.0081 | PC(O-34:0)                        | 0.00001  | 0.00004  | 0.00007  | 0.00004  | 0.00003  | 0.00000  | 0.00002  | 0.00000  | 0.00000  | 0.00000  | 0.002 | 0.006 | -2.9 |
| 14.99 | [M+H] <sup>+</sup> | 818.5976 | 818.6063 | 0.0087 | PC(O-40:7)                        | 0.00001  | 0.00013  | 0.00001  | 0.00001  | 0.00000  | 0.00004  | 0.00007  | 0.00006  | 0.00001  | 0.00007  | 0.179 | 0.266 | -    |
| 16.13 | [M-H] <sup>-</sup> | 716.5264 | 716.5236 | 0.0028 | PE(16:0-18:1)<br>+ PE(16:1-18:0)  | 13.21690 | 14.10126 | 13.44505 | 16.44676 | 16.23264 | 13.41940 | 10.69481 | 10.58532 | 13.49184 | 11.13568 | 0.017 | 0.037 | -0.3 |
| 14.72 | [M-H] <sup>-</sup> | 738.5118 | 738.5079 | 0.0039 | PE(16:0-20:4)                     | 3.09952  | 3.24912  | 3.22666  | 3.92056  | 4.88500  | 0.60325  | 0.54020  | 0.49326  | 0.64993  | 0.51478  | 0.000 | 0.000 | -2.7 |
| 13.61 | [M-H] <sup>-</sup> | 686.4800 | 686.4766 | 0.0034 | PE(16:1/16:1)                     | 1.02441  | 1.08415  | 1.08109  | 1.31304  | 1.29848  | 3.98628  | 3.23333  | 3.22992  | 4.11097  | 3.58447  | 0.000 | 0.000 | 1.6  |
| 17.68 | [M-H] <sup>-</sup> | 744.5607 | 744.5549 | 0.0058 | PE(18:0-18:1)                     | 7.98581  | 8.55515  | 8.17684  | 10.23152 | 10.03026 | 5.86195  | 4.40386  | 4.75740  | 5.74619  | 4.95021  | 0.000 | 0.000 | -0.8 |
| 16.72 | [M-H] <sup>-</sup> | 768.5532 | 768.5549 | 0.0017 | PE(18:0-20:3a)<br>+ PE(18:1-20:2) | 0.08436  | 0.11130  | 1.05899  | 1.31300  | 1.33355  | 0.81477  | 0.62209  | 0.64817  | 0.82844  | 0.68698  | 0.471 | 0.557 | -    |

Continued

| RT (min) | Adduct ion | row m/z  | theo m/z | delta m/z | Lipids                               | Adherent_1 | Adherent_2 | Adherent_3 | Adherent_4 | Adherent_5 | Sphere_1 | Sphere_2 | Sphere_3 | Sphere_4 | Sphere_5 | p.value | FDR   | log2(Fc) |
|----------|------------|----------|----------|-----------|--------------------------------------|------------|------------|------------|------------|------------|----------|----------|----------|----------|----------|---------|-------|----------|
| 17.34    | [M-H]-     | 768.5532 | 768.5549 | 0.0017    | PE(18:0-20:3b)                       | 0.06930    | 0.07698    | 0.07018    | 0.09708    | 0.09792    | 0.04389  | 0.03297  | 0.03105  | 0.06088  | 0.03023  | 0.001   | 0.004 | -1.0     |
| 16.23    | [M-H]-     | 742.5436 | 742.5392 | 0.0044    | PE(18:1/18:1)                        | 31.72315   | 33.26521   | 31.88965   | 39.58231   | 38.75855   | 43.99649 | 34.22331 | 34.20096 | 43.73264 | 35.94998 | 0.265   | 0.366 | -        |
| 15.27    | [M-H]-     | 740.5261 | 740.5236 | 0.0025    | PE(18:1-18:2)                        | 1.92500    | 2.04723    | 1.94159    | 2.48635    | 2.38994    | 4.02262  | 3.05577  | 3.19018  | 4.07979  | 3.33188  | 0.000   | 0.001 | 0.7      |
| 17.60    | [M-H]-     | 770.5724 | 770.5705 | 0.0019    | PE(18:1-20:1)                        | 1.21455    | 1.24884    | 1.23018    | 1.56091    | 1.50480    | 1.66392  | 1.21500  | 1.35181  | 1.61687  | 1.41359  | 0.398   | 0.500 | -        |
| 15.79    | [M-H]-     | 698.5130 | 698.5130 | 0.0000    | PE(O-16:1/18:2)<br>+ PE(O-18:2/16:1) | 0.29855    | 0.32173    | 0.30084    | 0.35761    | 0.35229    | 0.00274  | 0.00103  | 0.00179  | 0.00210  | 0.00106  | 0.000   | 0.000 | -7.5     |
| 15.42    | [M-H]-     | 722.5090 | 722.5130 | 0.0040    | PE(O-16:1/20:4)                      | 0.29389    | 0.32051    | 0.32356    | 0.36104    | 0.36326    | 0.00123  | 0.00058  | 0.00000  | 0.00000  | 0.00000  | 0.000   | 0.001 | -9.8     |
| 14.47    | [M-H]-     | 720.4927 | 720.4974 | 0.0047    | PE(O-16:1/20:5)<br>+ PE(O-16:2/20:4) | 0.08567    | 0.09986    | 0.09263    | 0.11287    | 0.11259    | 0.00032  | 0.00045  | 0.00111  | 0.00105  | 0.00056  | 0.000   | 0.000 | -7.2     |
| 17.41    | [M-H]-     | 752.5647 | 752.5600 | 0.0047    | PE(O-18:0/20:4)<br>+ PE(O-18:1/20:3) | 0.01001    | 0.00893    | 0.00967    | 0.01282    | 0.01069    | 0.00000  | 0.00000  | 0.00000  | 0.00000  | 0.00000  | 0.000   | 0.000 | -13.5    |
| 18.42    | [M-H]-     | 702.5471 | 702.5443 | 0.0028    | PE(O-18:1/16:0)<br>+ PE(O-16:1/18:0) | 0.00342    | 0.00562    | 0.00666    | 0.00745    | 0.00782    | 0.00000  | 0.00000  | 0.00000  | 0.00000  | 0.00000  | 0.000   | 0.000 | -12.8    |
| 18.36    | [M-H]-     | 728.5645 | 728.5600 | 0.0045    | PE(O-18:1/18:1)                      | 0.17620    | 0.18249    | 0.17638    | 0.22111    | 0.21323    | 0.00000  | 0.00025  | 0.00000  | 0.00000  | 0.00000  | 0.000   | 0.000 | -11.9    |
| 16.77    | [M-H]-     | 750.5482 | 750.5443 | 0.0039    | PE(O-18:1/20:4)                      | 0.12248    | 0.13257    | 0.12698    | 0.15440    | 0.15093    | 0.01015  | 0.00906  | 0.00695  | 0.00922  | 0.00684  | 0.000   | 0.000 | -4.0     |
| 17.05    | [M-H]-     | 726.5482 | 726.5443 | 0.0039    | PE(O-18:2/18:1)                      | 0.15094    | 0.16083    | 0.15054    | 0.19008    | 0.18312    | 0.00000  | 0.00000  | 0.00000  | 0.00000  | 0.00000  | 0.000   | 0.000 | -17.5    |
| 12.88    | [M+H]+     | 675.5430 | 675.5422 | 0.0008    | SM(d32:1)                            | 0.05695    | 0.05742    | 0.06327    | 0.03211    | 0.03617    | 0.04267  | 0.07155  | 0.06822  | 0.04268  | 0.05997  | 0.395   | 0.500 | -        |
| 14.90    | [M+H]+     | 705.5843 | 705.5910 | 0.0067    | SM(d34:0)                            | 0.14815    | 0.13190    | 0.16216    | 0.08763    | 0.08717    | 0.08480  | 0.13759  | 0.12899  | 0.08128  | 0.11471  | 0.539   | 0.625 | -        |
| 14.23    | [M+H]+     | 703.5706 | 703.5754 | 0.0048    | SM(d34:1)                            | 1.52472    | 0.00729    | 0.06812    | 0.95107    | 0.00371    | 1.32378  | 2.30268  | 2.22549  | 1.39656  | 1.87768  | 0.034   | 0.062 | 1.8      |
| 13.08    | [M+H]+     | 701.5537 | 701.5597 | 0.0060    | SM(d34:2)                            | 0.10222    | 0.10146    | 0.01772    | 0.05806    | 0.06443    | 0.02782  | 0.04372  | 0.04581  | 0.02695  | 0.03747  | 0.178   | 0.266 | -        |
| 15.66    | [M+H]+     | 731.6017 | 731.6067 | 0.0050    | SM(d36:1)                            | 0.00071    | 0.00053    | 0.00712    | 0.00275    | 0.00055    | 0.00049  | 0.00052  | 0.00057  | 0.00031  | 0.00045  | 0.080   | 0.134 | -        |
| 18.89    | [M+H]+     | 787.6612 | 787.6693 | 0.0081    | SM(d40:1)                            | 0.13361    | 0.13711    | 0.14789    | 0.06826    | 0.07705    | 0.05424  | 0.09095  | 0.08907  | 0.05460  | 0.04090  | 0.044   | 0.080 | -0.8     |
| 20.29    | [M+H]+     | 815.6939 | 815.7006 | 0.0067    | SM(d42:1)                            | 0.31877    | 0.32933    | 0.35327    | 0.16048    | 0.18182    | 0.07635  | 0.13333  | 0.13067  | 0.07738  | 0.09830  | 0.002   | 0.005 | -1.4     |

Continued

| RT (min) | Adduct ion           | row m/z  | theo m/z | delta m/z | Lipids                                    | Adherent_1 | Adherent_2 | Adherent_3 | Adherent_4 | Adherent_5 | Sphere_1 | Sphere_2 | Sphere_3 | Sphere_4 | Sphere_5 | p.value | FDR   | log2(Fc) |
|----------|----------------------|----------|----------|-----------|-------------------------------------------|------------|------------|------------|------------|------------|----------|----------|----------|----------|----------|---------|-------|----------|
| 18.69    | [M+H] <sup>+</sup>   | 813.6772 | 813.6849 | 0.0077    | SM(d42:2a)                                | 1.04417    | 0.44401    | 1.17771    | 0.54382    | 0.60630    | 0.31388  | 1.47169  | 1.43009  | 0.86734  | 1.20765  | 0.457   | 0.551 | -        |
| 19.78    | [M+H] <sup>+</sup>   | 813.6790 | 813.6849 | 0.0059    | SM(d42:2b)                                | 0.01481    | 0.00568    | 0.01584    | 0.00748    | 0.00310    | 0.00937  | 0.01556  | 0.01520  | 0.00918  | 0.01261  | 0.230   | 0.330 | -        |
| 21.81    | [M+H] <sup>+</sup>   | 843.7227 | 843.7319 | 0.0092    | SM(d44:1)                                 | 0.04404    | 0.04516    | 0.04557    | 0.01317    | 0.00931    | 0.00656  | 0.01101  | 0.01076  | 0.00662  | 0.00930  | 0.018   | 0.037 | -1.8     |
| 20.16    | [M+H] <sup>+</sup>   | 841.7089 | 841.7162 | 0.0073    | SM(d44:2)                                 | 0.34294    | 0.34246    | 0.13121    | 0.16901    | 0.19248    | 0.10557  | 0.17726  | 0.17888  | 0.10525  | 0.10778  | 0.056   | 0.100 | -        |
| 24.44    | [M+NH4] <sup>+</sup> | 796.7320 | 796.7394 | 0.0074    | TG(14:0-16:0-16:0)                        | 0.00273    | 0.00210    | 0.00195    | 0.00100    | 0.00112    | 0.00099  | 0.00071  | 0.00149  | 0.00125  | 0.00156  | 0.168   | 0.258 | -        |
| 25.79    | [M+NH4] <sup>+</sup> | 852.7945 | 852.8020 | 0.0075    | TG(16:0-16:0-18:0)                        | 0.00140    | 0.00107    | 0.00094    | 0.00048    | 0.00049    | 0.00036  | 0.00024  | 0.00053  | 0.00041  | 0.00053  | 0.029   | 0.056 | -1.1     |
| 26.63    | [M+NH4] <sup>+</sup> | 880.8262 | 880.8333 | 0.0071    | TG(16:0-18:0-18:0)                        | 0.00043    | 0.00033    | 0.00030    | 0.00016    | 0.00018    | 0.00013  | 0.00008  | 0.00021  | 0.00015  | 0.00023  | 0.070   | 0.121 | -        |
| 24.86    | [M+NH4] <sup>+</sup> | 876.7915 | 876.8015 | 0.0100    | TG(16:0-18:1-18:1)                        | 0.11394    | 0.08614    | 0.08509    | 0.04249    | 0.04726    | 0.05157  | 0.03792  | 0.08039  | 0.06480  | 0.06850  | 0.469   | 0.557 | -        |
| 22.89    | [M+NH4] <sup>+</sup> | 818.7166 | 818.7238 | 0.0072    | TG(16:1/16:1/16:1)<br>+TG(14:1-16:1-18:1) | 0.00201    | 0.00156    | 0.00141    | 0.00071    | 0.00079    | 0.00737  | 0.00572  | 0.01168  | 0.00952  | 0.01037  | 0.000   | 0.000 | 2.8      |
| 23.59    | [M+NH4] <sup>+</sup> | 846.7481 | 846.7551 | 0.0070    | TG(16:1-16:1-18:1)                        | 0.02047    | 0.01579    | 0.01566    | 0.00734    | 0.00831    | 0.02912  | 0.02216  | 0.04599  | 0.03765  | 0.04084  | 0.003   | 0.008 | 1.4      |
| 24.22    | [M+NH4] <sup>+</sup> | 874.7792 | 874.7864 | 0.0072    | TG(16:1-18:1-18:1)                        | 0.06755    | 0.05120    | 0.05100    | 0.02568    | 0.02818    | 0.04983  | 0.03760  | 0.07949  | 0.06399  | 0.06849  | 0.192   | 0.278 | -        |
| 24.80    | [M+NH4] <sup>+</sup> | 902.8091 | 902.8177 | 0.0086    | TG(18:1/18:1/18:1)                        | 0.08735    | 0.06767    | 0.06617    | 0.03336    | 0.03631    | 0.04284  | 0.03224  | 0.06838  | 0.05357  | 0.05858  | 0.694   | 0.755 | -        |
| 24.21    | [M+NH4] <sup>+</sup> | 900.7945 | 900.8015 | 0.0070    | TG(18:1-18:1-18:2)                        | 0.00867    | 0.00630    | 0.00642    | 0.00242    | 0.00231    | 0.00594  | 0.00447  | 0.00936  | 0.00671  | 0.00818  | 0.235   | 0.332 | -        |
| 23.83    | [M+NH4] <sup>+</sup> | 950.8079 | 950.8177 | 0.0098    | TG(18:1-18:1-22:5)                        | 0.00522    | 0.00409    | 0.00398    | 0.00180    | 0.00214    | 0.00008  | 0.00007  | 0.00013  | 0.00012  | 0.00012  | 0.000   | 0.000 | -5.0     |
| 23.55    | [M+NH4] <sup>+</sup> | 948.7928 | 948.8020 | 0.0092    | TG(18:1-18:1-22:6)                        | 0.00396    | 0.00306    | 0.00305    | 0.00139    | 0.00163    | 0.00004  | 0.00002  | 0.00007  | 0.00004  | 0.00005  | 0.000   | 0.000 | -5.8     |
| 23.76    | [M+NH4] <sup>+</sup> | 768.7026 | 768.7081 | 0.0055    | TG(44:0)                                  | 0.00096    | 0.00070    | 0.00070    | 0.00031    | 0.00040    | 0.00037  | 0.00028  | 0.00058  | 0.00049  | 0.00055  | 0.329   | 0.438 | -        |
| 23.67    | [M+NH4] <sup>+</sup> | 794.7172 | 794.7238 | 0.0066    | TG(46:1)                                  | 0.00745    | 0.00581    | 0.00548    | 0.00253    | 0.00298    | 0.00423  | 0.00316  | 0.00642  | 0.00543  | 0.00576  | 0.747   | 0.792 | -        |
| 22.91    | [M+NH4] <sup>+</sup> | 792.7018 | 792.7081 | 0.0063    | TG(46:2)                                  | 0.00201    | 0.00160    | 0.00156    | 0.00050    | 0.00080    | 0.00427  | 0.00325  | 0.00647  | 0.00547  | 0.00577  | 0.001   | 0.003 | 2.0      |
| 24.02    | [M+NH4] <sup>+</sup> | 808.7324 | 808.7389 | 0.0065    | TG(47:1)                                  | 0.00193    | 0.00155    | 0.00145    | 0.00069    | 0.00080    | 0.00043  | 0.00031  | 0.00063  | 0.00055  | 0.00071  | 0.009   | 0.020 | -1.3     |

Continued

| RT (min) | Adduct ion           | row m/z  | theo m/z | delta m/z | Lipids   | Adherent_1 | Adherent_2 | Adherent_3 | Adherent_4 | Adherent_5 | Sphere_1 | Sphere_2 | Sphere_3 | Sphere_4 | Sphere_5 | p.value | FDR   | log2(Fc) |
|----------|----------------------|----------|----------|-----------|----------|------------|------------|------------|------------|------------|----------|----------|----------|----------|----------|---------|-------|----------|
| 24.35    | [M+NH4] <sup>+</sup> | 822.7481 | 822.7551 | 0.0070    | TG(48:1) | 0.02432    | 0.01804    | 0.01745    | 0.00869    | 0.00971    | 0.01040  | 0.00778  | 0.01575  | 0.01301  | 0.01420  | 0.412   | 0.507 | -        |
| 23.64    | [M+NH4] <sup>+</sup> | 820.7331 | 820.7394 | 0.0063    | TG(48:2) | 0.02251    | 0.01732    | 0.01704    | 0.00806    | 0.00919    | 0.01927  | 0.01472  | 0.02993  | 0.02492  | 0.02661  | 0.073   | 0.124 | -        |
| 24.64    | [M+NH4] <sup>+</sup> | 836.7628 | 836.7707 | 0.0079    | TG(49:1) | 0.00403    | 0.00165    | 0.00294    | 0.00140    | 0.00161    | 0.00071  | 0.00052  | 0.00108  | 0.00088  | 0.00109  | 0.005   | 0.012 | -1.4     |
| 23.96    | [M+NH4] <sup>+</sup> | 834.7477 | 834.7551 | 0.0074    | TG(49:2) | 0.00312    | 0.00252    | 0.00237    | 0.00107    | 0.00128    | 0.00067  | 0.00030  | 0.00103  | 0.00043  | 0.00101  | 0.008   | 0.018 | -1.6     |
| 24.99    | [M+NH4] <sup>+</sup> | 850.7788 | 850.7864 | 0.0076    | TG(50:1) | 0.03185    | 0.02456    | 0.02312    | 0.01148    | 0.01289    | 0.01215  | 0.00895  | 0.01883  | 0.01497  | 0.01627  | 0.191   | 0.278 | -        |
| 24.26    | [M+NH4] <sup>+</sup> | 848.7610 | 848.7707 | 0.0097    | TG(50:2) | 0.07637    | 0.05939    | 0.05706    | 0.02983    | 0.03227    | 0.04206  | 0.03213  | 0.06474  | 0.05345  | 0.05815  | 0.939   | 0.962 | -        |
| 23.93    | [M+NH4] <sup>+</sup> | 860.7627 | 860.7707 | 0.0080    | TG(51:3) | 0.00202    | 0.00040    | 0.00155    | 0.00068    | 0.00083    | 0.00047  | 0.00034  | 0.00074  | 0.00056  | 0.00067  | 0.124   | 0.199 | -        |
| 25.65    | [M+NH4] <sup>+</sup> | 878.8099 | 878.8177 | 0.0078    | TG(52:1) | 0.01259    | 0.00989    | 0.00881    | 0.00059    | 0.00475    | 0.00289  | 0.00207  | 0.00436  | 0.00337  | 0.00088  | 0.269   | 0.368 | -        |
| 23.61    | [M+NH4] <sup>+</sup> | 872.7636 | 872.7707 | 0.0071    | TG(52:4) | 0.00395    | 0.00310    | 0.00304    | 0.00143    | 0.00162    | 0.00485  | 0.00367  | 0.00756  | 0.00624  | 0.00666  | 0.008   | 0.018 | 1.1      |
| 25.96    | [M+NH4] <sup>+</sup> | 892.8244 | 892.8333 | 0.0089    | TG(53:1) | 0.00088    | 0.00074    | 0.00068    | 0.00031    | 0.00038    | 0.00013  | 0.00010  | 0.00022  | 0.00016  | 0.00021  | 0.001   | 0.003 | -1.9     |
| 24.52    | [M+NH4] <sup>+</sup> | 888.7934 | 888.8020 | 0.0086    | TG(53:3) | 0.00501    | 0.00395    | 0.00367    | 0.00171    | 0.00198    | 0.00078  | 0.00058  | 0.00106  | 0.00093  | 0.00097  | 0.001   | 0.002 | -1.9     |
| 23.97    | [M+NH4] <sup>+</sup> | 886.7779 | 886.7864 | 0.0085    | TG(53:4) | 0.00059    | 0.00047    | 0.00045    | 0.00022    | 0.00026    | 0.00013  | 0.00008  | 0.00019  | 0.00015  | 0.00018  | 0.004   | 0.010 | -1.4     |
| 26.41    | [M+NH4] <sup>+</sup> | 906.8408 | 906.8490 | 0.0082    | TG(54:1) | 0.00184    | 0.00140    | 0.00132    | 0.00064    | 0.00071    | 0.00046  | 0.00033  | 0.00072  | 0.00060  | 0.00063  | 0.019   | 0.040 | -1.1     |
| 25.53    | [M+NH4] <sup>+</sup> | 904.8257 | 904.8333 | 0.0076    | TG(54:2) | 0.03542    | 0.02782    | 0.02541    | 0.01190    | 0.01347    | 0.00981  | 0.00720  | 0.01502  | 0.01165  | 0.01262  | 0.030   | 0.057 | -1.0     |
| 23.72    | [M+NH4] <sup>+</sup> | 898.7780 | 898.7864 | 0.0084    | TG(54:5) | 0.00224    | 0.00178    | 0.00184    | 0.00083    | 0.00095    | 0.00096  | 0.00074  | 0.00148  | 0.00123  | 0.00138  | 0.344   | 0.448 | -        |
| 23.32    | [M+NH4] <sup>+</sup> | 896.7615 | 896.7707 | 0.0092    | TG(54:6) | 0.00248    | 0.00194    | 0.00188    | 0.00086    | 0.00105    | 0.00011  | 0.00009  | 0.00016  | 0.00014  | 0.00017  | 0.000   | 0.000 | -3.6     |
| 22.86    | [M+NH4] <sup>+</sup> | 894.7477 | 894.7551 | 0.0074    | TG(54:7) | 0.00142    | 0.00109    | 0.00088    | 0.00049    | 0.00060    | 0.00005  | 0.00004  | 0.00008  | 0.00005  | 0.00007  | 0.000   | 0.000 | -3.9     |
| 23.60    | [M+NH4] <sup>+</sup> | 910.7780 | 910.7864 | 0.0084    | TG(55:6) | 0.00047    | 0.00037    | 0.00036    | 0.00017    | 0.00020    | 0.00001  | 0.00001  | 0.00002  | 0.00002  | 0.00002  | 0.000   | 0.000 | -4.4     |
| 25.40    | [M+NH4] <sup>+</sup> | 930.8405 | 930.8490 | 0.0085    | TG(56:3) | 0.01601    | 0.01693    | 0.01607    | 0.00746    | 0.00840    | 0.00980  | 0.00745  | 0.01554  | 0.01175  | 0.01347  | 0.714   | 0.770 | -        |

Continued

| RT (min) | Adduct ion           | row m/z  | theo m/z | delta m/z | Lipids   | Adherent_1 | Adherent_2 | Adherent_3 | Adherent_4 | Adherent_5 | Sphere_1 | Sphere_2 | Sphere_3 | Sphere_4 | Sphere_5 | p.value | FDR   | log2(Fc) |
|----------|----------------------|----------|----------|-----------|----------|------------|------------|------------|------------|------------|----------|----------|----------|----------|----------|---------|-------|----------|
| 24.78    | [M+NH4] <sup>+</sup> | 928.8242 | 928.8333 | 0.0091    | TG(56:4) | 0.00115    | 0.00205    | 0.00095    | 0.00042    | 0.00077    | 0.00105  | 0.00091  | 0.00234  | 0.00184  | 0.00130  | 0.238   | 0.332 | -        |
| 24.45    | [M+NH4] <sup>+</sup> | 926.8090 | 926.8177 | 0.0087    | TG(56:5) | 0.00067    | 0.00088    | 0.00079    | 0.00050    | 0.00025    | 0.00008  | 0.00004  | 0.00004  | 0.00002  | 0.00004  | 0.000   | 0.000 | -3.8     |
| 23.87    | [M+NH4] <sup>+</sup> | 924.7947 | 924.8020 | 0.0073    | TG(56:6) | 0.00567    | 0.00449    | 0.00427    | 0.00186    | 0.00227    | 0.00013  | 0.00010  | 0.00020  | 0.00014  | 0.00018  | 0.000   | 0.000 | -4.6     |
| 23.44    | [M+NH4] <sup>+</sup> | 922.7785 | 922.7864 | 0.0079    | TG(56:7) | 0.00190    | 0.00128    | 0.00151    | 0.00065    | 0.00081    | 0.00004  | 0.00003  | 0.00006  | 0.00006  | 0.00007  | 0.000   | 0.000 | -4.6     |
| 22.89    | [M+NH4] <sup>+</sup> | 920.7627 | 920.7702 | 0.0075    | TG(56:8) | 0.00111    | 0.00089    | 0.00089    | 0.00037    | 0.00046    | 0.00004  | 0.00002  | 0.00005  | 0.00004  | 0.00004  | 0.000   | 0.000 | -4.3     |
| 25.69    | [M+NH4] <sup>+</sup> | 944.8554 | 944.8646 | 0.0092    | TG(57:3) | 0.00097    | 0.00080    | 0.00052    | 0.00032    | 0.00037    | 0.00024  | 0.00017  | 0.00037  | 0.00026  | 0.00034  | 0.021   | 0.043 | -1.1     |
| 27.07    | [M+NH4] <sup>+</sup> | 960.8876 | 960.8954 | 0.0078    | TG(58:2) | 0.00429    | 0.00326    | 0.00325    | 0.00147    | 0.00172    | 0.00159  | 0.00113  | 0.00247  | 0.00185  | 0.00215  | 0.166   | 0.258 | -        |
| 26.09    | [M+NH4] <sup>+</sup> | 958.8723 | 958.8797 | 0.0074    | TG(58:3) | 0.00584    | 0.00672    | 0.00319    | 0.00189    | 0.00355    | 0.00237  | 0.00196  | 0.00384  | 0.00386  | 0.00701  | 0.737   | 0.788 | -        |
| 25.38    | [M+NH4] <sup>+</sup> | 956.8549 | 956.8646 | 0.0097    | TG(58:4) | 0.00211    | 0.00162    | 0.00159    | 0.00073    | 0.00083    | 0.00101  | 0.00077  | 0.00130  | 0.00125  | 0.00141  | 0.623   | 0.709 | -        |
| 24.94    | [M+NH4] <sup>+</sup> | 954.8396 | 954.8484 | 0.0088    | TG(58:5) | 0.00034    | 0.00016    | 0.00021    | 0.00005    | 0.00010    | 0.00001  | 0.00003  | 0.00008  | 0.00004  | 0.00007  | 0.020   | 0.040 | -1.9     |

**Supplementary Table 3.** Features with VIP scores of 1 or higher.

| <b>Compound</b>                      | <b>VIP score</b> |
|--------------------------------------|------------------|
| PEO-18:2/18:1                        | 2.7079           |
| PEO-18:1/18:1                        | 2.5836           |
| PEO-16:1/20:4                        | 2.4774           |
| PEO-18:0/20:4 or PEO-18:1/20:3       | 2.2061           |
| PEO-16:1/18:2 or PEO-18:2/16:1       | 2.0295           |
| PEO-18:1/16:0 or PEO-16:1/18:0       | 2.0063           |
| PEO-16:1/20:5 or PEO-16:2/20:4       | 1.858            |
| PCO-40:7                             | 1.6907           |
| PCO-32:0                             | 1.6645           |
| TG16:1/16:1/16:1 or TG14:1-16:1-18:1 | 1.6344           |
| PC38:7                               | 1.576            |
| PC40:7                               | 1.5621           |
| Cerd18:1/16:0                        | 1.5064           |
| TG46:2                               | 1.4789           |
| SMd34:1                              | 1.4429           |
| PCO-34:0                             | 1.3865           |
| PE16:0-20:4                          | 1.3607           |
| PEO-18:1/20:4                        | 1.3074           |
| PC40:8                               | 1.2865           |
| Cerd18:1/14:0                        | 1.2788           |
| TG16:1-16:1-18:1                     | 1.2752           |
| TG52:4                               | 1.2535           |
| TG16:0-18:0-18:0                     | 1.2346           |
| TG56:4                               | 1.2043           |
| PC36:5                               | 1.1816           |
| Cerd18:1/24:1                        | 1.1571           |
| TG18:1-18:1-22:6                     | 1.1522           |
| TG58:5                               | 1.1468           |
| TG18:1-18:1-22:5                     | 1.1226           |
| PCO-29:0                             | 1.1206           |
| TG44:0                               | 1.1157           |
| TG16:1-18:1-18:1                     | 1.0977           |
| PC3:02                               | 1.0806           |
| TG56:6                               | 1.0746           |
| TG48:2                               | 1.0578           |
| PE16:1/16:1                          | 1.0553           |
| TG53:4                               | 1.0529           |
| TG58:4                               | 1.0286           |
| TG18:1-18:1-18:2                     | 1.0019           |

**Supplementary Table 4.** Altered genes involved in unsaturated fatty acid biosynthesis between adherent and sphere MCF-7 cells.

| <b>Genes</b>  | <b>Fold change</b> |
|---------------|--------------------|
| <i>PTPLB</i>  | -1.22              |
| <i>PECR</i>   | -0.96              |
| <i>ELOVL2</i> | -0.63              |
| <i>ACOT4</i>  | -0.46              |
| <i>ACOX1</i>  | -0.24              |
| <i>ACOT7</i>  | -0.22              |
| <i>ELOVL6</i> | 0.2                |
| <i>HADHA</i>  | 0.47               |
| <i>FADS1</i>  | 0.8                |
| <i>ACOX3</i>  | 0.84               |
| <i>SCD</i>    | 1.88               |
